1 The *Salmonella* transmembrane effector  
2 SteD hijacks AP1-mediated vesicular  
3 trafficking for delivery to antigen-loading  
4 MHCII compartments

5 Camilla Godlee<sup>a\*</sup>, Ondrej Cerny<sup>a</sup>, Mei Liu<sup>a</sup>, Samkeliso Blundell<sup>a</sup>, Alanna E. Gallagher<sup>a</sup>, Meriam Shahin<sup>a</sup>  
6 and David W. Holden<sup>a\*</sup>,

7 <sup>a</sup>MRC Centre for Molecular Bacteriology and Infection, Imperial College London, Armstrong Road,  
8 London SW7 2AZ, UK.

9 \*For correspondence: [c.godlee@imperial.ac.uk](mailto:c.godlee@imperial.ac.uk), [d.holden@imperial.ac.uk](mailto:d.holden@imperial.ac.uk)

## 10 Abstract

11 SteD is a transmembrane effector of the *Salmonella* SPI-2 type III secretion system that inhibits T cell  
12 activation by reducing the amounts of at least three proteins – major histocompatibility complex II  
13 (MHCII), CD86 and CD97 – from the surface of antigen-presenting cells. SteD specifically localises at the  
14 *trans*-Golgi network (TGN) and MHCII compartments; however, the targeting, membrane integration  
15 and trafficking of SteD are not understood. Using systematic mutagenesis, we identify distinct regions  
16 of SteD that are required for these processes. We show that SteD integrates into membranes of the  
17 ER/Golgi through a two-step mechanism of membrane recruitment from the cytoplasm followed by  
18 integration. SteD then migrates to and accumulates within the TGN. From here it hijacks the host  
19 adaptor protein (AP)1-mediated trafficking pathway from the TGN to MHCII compartments. AP1  
20 binding and post-TGN trafficking require a short sequence in the N-terminal cytoplasmic tail of SteD  
21 that resembles the AP1-interacting dileucine sorting signal, but in inverted orientation, suggesting  
22 convergent evolution.

## 23 Introduction

24 The virulence of many bacterial pathogens relies on the delivery of effector proteins into host cells  
25 through secretion systems such as the type three secretion system (T3SS). These effectors manipulate  
26 immune responses and promote bacterial replication. Many effectors require a specific host cellular  
27 localisation for their function (1,2). A subset of bacterial effectors from diverse pathogens, localise by  
28 integrating into specific membranes of host cells. These include *Salmonella* SteD, SseF and SseG, *E. coli*  
29 Tir and *Chlamydia* Incs. These transmembrane effectors are often crucial to pathogenesis; however,  
30 their targeting, membrane integration and trafficking are poorly understood. It has been proposed that  
31 they could integrate into host membranes by either 1 – lateral transfer during translocation through  
32 the T3SS pore or 2 – direct integration following translocation into the cytoplasm (3).

33 Following uptake into a host cell, *Salmonella* resides within a membrane-bound compartment known  
34 as the *Salmonella*-containing vacuole (SCV), from which it delivers effectors of the *Salmonella*  
35 pathogenicity Island (SPI)-2 T3SS through the vacuolar membrane. One of these, SteD, reduces mature  
36 antigen-loaded major histocompatibility complex (mMHCII) and CD86 from the surface of infected  
37 antigen-presenting cells, resulting in a reduction in T cell activation (4). It also reduces CD97 cell surface  
38 levels, which destabilises immunological synapses formed between dendritic cells and T cells (5). It thus  
39 has an inhibitory effect on the adaptive immune response to *Salmonella*. mMHCII and CD97 interact  
40 with SteD and are ubiquitinated by the NEDD4 family HECT E3 ubiquitin ligase WWP2, generating  
41 predominantly K63 linkages and resulting in their lysosomal degradation (5,6). SteD is also ubiquitinated  
42 by WWP2 in a way that augments its activity yet results in its lysosomal degradation (6). The mechanism  
43 underlying this activity involves an intramembrane interaction between SteD and the transmembrane  
44 protein TMEM127, which acts as an adaptor for WWP2 (6).

45 SteD is 111 amino acids in length, has two transmembrane domains and integrates into host cell  
46 membranes such that both the N and C termini are exposed to the cytoplasm, separated by a luminal  
47 loop. Interaction with the *Salmonella* chaperone SrcA is required for SteD solubility in the *Salmonella*

48 cytoplasm and efficient translocation (7). Following bacterial translocation or exogenous expression in  
49 host cells, the majority of SteD is at the *trans*-Golgi network (TGN) (4). It also localises to endosomal  
50 compartments including MHCII compartments, where mMHCII and CD97 are also found (4,5).

51 Despite some understanding of the protein-protein interactions required for SteD function, it remains  
52 unclear how SteD integrates into membranes, what is required for its localisation, and whether its  
53 localisation at the TGN is important for function. Through mutagenesis, we have found three different  
54 regions of SteD that are required for its localization, integration, and vesicular trafficking. Our results  
55 suggest that following translocation, a cytoplasmic intermediate of SteD is recruited to the ER or Golgi,  
56 where it undergoes membrane integration before transport to the TGN. Through interaction with the  
57 TGN-associated adaptor protein (AP)1 complex SteD then co-opts a post-TGN vesicular trafficking  
58 pathway to MHCII compartments, where it carries out its function.

## 59 RESULTS

### 60 Two regions of SteD are required for membrane integration

61 Ectopic expression of GFP-SteD in antigen-presenting cells recapitulates the bacterially translocated  
62 protein with respect to subcellular localisation, membrane integration and reduction of mMHCI cell  
63 surface levels (4). This shows that these processes do not require any other *Salmonella* factor and that  
64 SteD function is not affected by the GFP tag. Therefore, we investigated the requirements for  
65 membrane integration and localisation of SteD using this system. In previous work from our group,  
66 alanine scanning mutagenesis of sequential blocks of 5-7 amino acids resulted in 20 different mutants  
67 (Fig S1A), 18 of which localised correctly at the TGN (4). The other two mutants (SteD<sub>ala9</sub> and SteD<sub>ala13</sub>)  
68 were not detectable (4). In SteD<sub>ala9</sub>, the substituted residues (LMCLG) are in the N-terminal  
69 transmembrane domain (Fig 1A). In SteD<sub>ala13</sub>, the substituted residues (SVSSG) are in the luminal loop  
70 (Fig 1A). In the presence of MG132 (an inhibitor of proteasome degradation), both mutants were  
71 detected by immunoblot (Fig 1B), indicating that mutation of either region results in protein  
72 degradation.

73 Next, we analysed whether these regions are important for SteD function by measuring cell surface  
74 levels of mMHCI by flow cytometry after expression of both mutants by transfection into Mel Juso cells  
75 in the presence of MG132. As expected, wild-type (wt) GFP-SteD decreased surface levels of mMHCI  
76 compared to untransfected cells (Fig 1C and Fig S1B). For cells expressing GFP-SteD the presence of  
77 MG132 reduced but did not prevent the decrease in surface mMHCI (Fig S1C). However, in cells  
78 containing similar levels of either GFP-SteD<sub>ala9</sub>, GFP-SteD<sub>ala13</sub> or GFP alone, there was no significant  
79 reduction in mMHCI surface levels (Fig 1C and Fig S1B), demonstrating that the mutated regions are  
80 required for the function of SteD.

81 To test whether GFP-SteD<sub>ala9</sub> or GFP-SteD<sub>ala13</sub> integrate into mammalian cell membranes we subjected  
82 transfected cells to biochemical fractionation. Cell lysates were pelleted by ultracentrifugation to  
83 distinguish cytoplasmic proteins (including actin) from membrane-associated and integral membrane

84 proteins, and then pellets were solubilised with either urea (to extract peripheral membrane proteins,  
85 including Golgin-97) or RIPA buffer (to extract integral membrane proteins, including the DR $\alpha$  chain of  
86 MHCII). As expected, wt GFP-SteD, along with DR $\alpha$ , was present in the pellet after the initial  
87 centrifugation and the urea wash, but was solubilised by RIPA, confirming its integration into host  
88 membranes. However, both GFP-SteD<sub>ala9</sub> and GFP-SteD<sub>ala13</sub> were resistant to solubilisation with RIPA  
89 (Fig 1D). This indicates that neither mutant underwent membrane integration, but instead formed  
90 insoluble aggregates. Therefore, amino acids within the mutated regions of SteD<sub>ala9</sub> (hereafter referred  
91 to as Region 9) and SteD<sub>ala13</sub> (hereafter referred to as Region 13) are required for membrane integration  
92 and functionality of SteD.

## 93 **A two-step process for post-translocation membrane** 94 **integration**

95 To determine how these mutations affected SteD localisation in the host cell, we examined GFP-SteD<sub>ala9</sub>  
96 and GFP-SteD<sub>ala13</sub> in the presence of MG132 by fluorescence microscopy. Whereas a large proportion  
97 of wt GFP-SteD colocalised with the TGN marker TGN46, GFP-SteD<sub>ala9</sub> formed cytoplasmic punctate  
98 structures that colocalised with ubiquitin (Fig 2A and Fig S2A). This, along with its resistance to  
99 detergent extraction (Fig 1D) indicates that when proteasome activity is inhibited, GFP-SteD<sub>ala9</sub> forms  
100 cytoplasmic aggregates that resemble aggresomes or inclusion bodies (8). In contrast, SteD<sub>ala13</sub>  
101 colocalised with TGN46, although to a lesser extent than wt GFP-SteD (Fig 2A and B). Time-lapse  
102 microscopy revealed that wt GFP-SteD was present in motile vesicles, whereas GFP-SteD<sub>ala13</sub> remained  
103 stably associated with the Golgi area (Video S1). Therefore, in the presence of MG132, SteD<sub>ala13</sub>  
104 remained in a Golgi-associated non-integrating state, which then formed insoluble aggregates after cell  
105 lysis (Fig 1D). These results show that SteD localisation at the Golgi can be uncoupled from membrane  
106 integration, with Region 9 mediating interaction with a membrane component, while Region 13 is  
107 required for integration following Golgi association.

108 To test whether Region 13 promotes membrane integration of other transmembrane sequences, we  
109 created a chimeric protein in which the transmembrane domains of SteD were replaced by those of  
110 another *Salmonella* integral membrane effector – SseG, which has a similar membrane topology to  
111 SteD. This construct (SteD<sub>TM<sup>SseG</sup></sub>, Fig 2C) therefore contained SteD Region 13 but lacked Region 9.  
112 Fractionation experiments demonstrated that SteD<sub>TM<sup>SseG</sup></sub> underwent membrane integration (Fig 2D),  
113 and this was dependent on Region 13, as demonstrated by the lack of RIPA solubility following its  
114 alanine substitution (SteD<sub>TM<sup>SseGala13</sup></sub>, Fig 2D). In contrast to SteD, SseG localised at membranes  
115 throughout the cytoplasm (Fig 2E). Both GFP-SteD<sub>TM<sup>SseG</sup></sub> and GFP-SteD<sub>TM<sup>SseGala13</sup></sub> had a similar localisation  
116 to mCherry-SseG (Fig 2E). This agrees with previous work showing that the transmembrane domains of  
117 SseG direct its localisation in the host cell (9) and demonstrates that this localisation is also independent  
118 from membrane integration. Therefore, Region 13 is sufficient to mediate integration of alternative  
119 transmembrane domains following targeting to a different membrane compartment.

120 We next examined the process of membrane integration after translocation of SteD by the SPI-2 T3SS.  
121 However, SteD<sub>ala9</sub> and SteD<sub>ala13</sub> were not stably expressed or translocated by *Salmonella* (Fig S3A).  
122 Therefore, we carried out more specific mutagenesis to identify the residues within Regions 9 and 13,  
123 whose loss accounts for the properties of SteD<sub>ala9</sub> and SteD<sub>ala13</sub>. To do this we first tested the ability of  
124 GFP-tagged single and double residue alanine substitutions to reduce mMHCII surface levels. All the  
125 single residue substitutions were still functional (Fig S3B). The double substitution mutants with the  
126 strongest functional impairment (SteD<sub>L42A,M43A</sub> and SteD<sub>S68A,G69A</sub>, Fig 3A and Fig S3C) were tested for  
127 expression in *Salmonella*. Both mutants were translocated into Mel Juso cells and the protein levels  
128 were rescued by MG132, demonstrating that they both underwent proteasomal degradation (Fig S3D).  
129 Mel Juso cells with similar levels of SteD<sub>L42A,M43A</sub>-HA and SteD<sub>S68A,G69A</sub>-HA as wt SteD-HA had no reduction  
130 in mMHCII surface levels (Fig 3B and Fig S3E). Biochemical fractionation revealed that both SteD<sub>L42A,M43A</sub>-  
131 HA and SteD<sub>S68A,G69A</sub>-HA were not solubilised by RIPA indicating that they failed to integrate into host  
132 cell membranes (Fig 3C). Furthermore, SteD<sub>L42A,M43A</sub>-HA was found in large puncta throughout the host  
133 cell cytoplasm, while SteD<sub>S68A,G69A</sub>-HA colocalised with TGN46 (Fig 3D and E). Therefore, following

134 translocation, these mutants recapitulated the non-integration and localisation properties of GFP-  
135 SteD<sub>ala9</sub> and GFP-SteD<sub>ala13</sub> respectively, indicating that translocated SteD uses the same integration  
136 mechanism as ectopically expressed GFP-SteD.

137 Collectively, these results show that following translocation from bacteria, SteD integrates into host cell  
138 membranes with a two-step mechanism. First SteD is recruited from the cytoplasm by residues L42 and  
139 M43 of Region 9, presumably by interaction with a membrane component(s) and this is followed by  
140 integration mediated by residues S68 and G69 of Region 13.

## 141 **SteD integrates into membranes of the early secretory** 142 **pathway**

143 We investigated whether the membrane interaction and integration steps occur at the TGN or if SteD  
144 accumulates there after integrating elsewhere in the secretory pathway. To do this we used a  
145 doxycycline-regulated promoter to derepress expression of SteD from a mammalian expression plasmid  
146 after blocking Golgi trafficking with brefeldin A (BFA). BFA causes the collapse of Golgi membranes into  
147 the ER and fusion of TGN membranes with endosomes, thereby separating the early from the late  
148 secretory pathway (10,11). When SteD expression was induced in the absence of BFA (dox), it  
149 integrated into membranes at both the TGN and MHCII compartments, as expected (Fig 4A-C and Fig  
150 S4A). When expressed after Golgi disruption (BFA-dox) SteD still underwent membrane integration (Fig  
151 4C) but localised predominantly at the ER and no longer colocalised with TGN46 (Fig 4A and B). GFP-  
152 SteD<sub>ala13</sub> also localised at the ER when expressed after BFA treatment in the presence of MG132 (Fig 4A  
153 and B, BFA-dox), demonstrating that the SteD membrane interaction partner re-distributes to the ER  
154 after BFA treatment. Therefore, both membrane interaction and integration occur at the ER or Golgi,  
155 and not at the TGN.

156 In the presence of BFA, SteD did not cause a significant reduction in mMHCII surface levels (Fig 4D and  
157 Fig S4B) and this correlated with a failure to colocalise with mMHCII (Fig S4A). This demonstrates that



158 post-Golgi trafficking is required for SteD to reach MHCII compartments and for SteD function. Indeed,  
159 after bleaching the fluorescent signal from GFP-SteD outside of the Golgi area we detected vesicles  
160 containing GFP-SteD budding from the Golgi/TGN area by time-lapse microscopy. These vesicles  
161 trafficked throughout the cell with some apparently fusing to and budding from other SteD-containing  
162 compartments (Video S2 and Fig S4C). Since there is a large amount of colocalisation between GFP-  
163 SteD and mMHCII in the periphery of the cell (Bayer-Santos et al., 2016), a substantial proportion of  
164 these are likely to be MHCII compartments. The stable association of SteD<sub>ala13</sub> with the TGN (Fig 2A and  
165 Video S1) indicates that post-TGN trafficking of SteD requires membrane integration.

166 Therefore, rather than integrating into the TGN directly, SteD either interacts with an ER or Golgi  
167 cisternae component and integrates into these membranes before accumulating at the TGN. SteD is  
168 then trafficked to MHCII compartments, and this is required for its function.

## 169 **AP1 mediates trafficking of SteD to MHCII compartments** 170 **via a sequence resembling an inverted dileucine motif**

171 The TGN acts as a sorting platform for the anterograde traffic of protein cargo from the Golgi.  
172 Transmembrane cargo proteins frequently use short linear motifs known as sorting signals in their  
173 cytoplasmic tails. Sorting signals are recognised by cytoplasmic adaptor proteins, including  
174 heterotetrameric AP complexes, allowing concentration of cargo into vesicles targeted to specific  
175 membrane compartments (12). In the absence of a sorting signal, proteins traffic constitutively from  
176 the TGN to the PM (13). To determine if SteD interacts with an AP complex we used  
177 coimmunoprecipitation experiments after chemical crosslinking with dithiobis(succinimidyl  
178 propionate) (DSP), which has been shown to be effective for detecting transient interactions between  
179 transmembrane proteins and cytoplasmic interaction partners (14). Ectopically expressed GFP-SteD  
180 was immunoprecipitated from Mel Juso cell lysates using GFP-trap beads and proteins were subjected  
181 to immunoblotting with antibodies against specific subunits of the AP1, 2 or 3 complexes. GFP-tagged

182 SseG was used as a negative control. A small amount of AP1 interacted specifically and reproducibly  
183 with GFP-SteD (Fig 5A and B) but not GFP-SseG.

184 AP1 regulates the trafficking of protein cargo between the TGN and endosomes (15). To test whether  
185 AP1 is involved in trafficking of SteD to MHCII compartments we used siRNA to knock down the  $\beta$   
186 subunit of AP1 in Mel Juso cells expressing GFP-tagged SteD (Fig 5C). AP1 knockdown had no noticeable  
187 effect on cellular mMHCII signal but caused a significant reduction in colocalisation between GFP-SteD  
188 and MHCII compartments when compared to mock-treated cells or knockdown of AP2 and AP3 (Fig 5D  
189 and E). Despite this reduced colocalisation, knockdown of AP1 had no detectable effect on SteD-  
190 dependent reduction of mMHCII surface levels (Fig S5A). While there was no detectable increase in  
191 GFP-SteD at the PM (Fig S5B) we conclude that under these conditions a small proportion of SteD is still  
192 able to interact with MHCII either intracellularly or at the PM.

193 We next tested whether there is information in the N- or C-terminal cytoplasmic tails of SteD that is  
194 required for its AP1-mediated trafficking. Truncation mutants of GFP-SteD lacking the C-terminal tail or  
195 most of the N-terminal tail (Fig 6A and Fig S6A) underwent membrane integration as assessed by  
196 biochemical fractionation (Fig 6B). Truncation of the C-terminal tail (GFP-SteD<sub>1-102</sub>) did not affect  
197 localisation at the TGN and MHCII compartments (Fig 6C and Fig S6B). On the other hand, an SteD  
198 truncation lacking most of the N-terminal cytoplasmic tail (GFP-SteD<sub>37-111</sub>) had reduced localisation at  
199 MHCII compartments (Fig 6C). Furthermore, and in contrast to AP1 depletion, truncation of the N-  
200 terminal tail resulted in a dramatic increase in the proportion of fluorescence signal at the cell surface  
201 and a decrease in fluorescence signal at the TGN (Fig 6C and D and Fig S6B). The continuous distribution  
202 of fluorescence signal at the cell surface along with the ability to integrate into the membrane implies  
203 a PM localisation. Remarkably, a construct lacking most of the N-terminal tail and the C-terminal tail  
204 (GFP-SteD<sub>37-102</sub>), leaving just 65 residues comprising the two transmembrane domains separated by the  
205 luminal loop and containing Regions 9 and 13, also integrated efficiently into host cell membranes (Fig  
206 6A and B) and along with GFP-SteD<sub>37-111</sub>, localised at the TGN as well as the PM (Fig 6C and D).

207 To test whether the PM localisation was due to traffic from the TGN, we used the photoconvertible  
208 fluorescent protein mEos, which converts from green to red fluorescence upon activation with UV light,  
209 to specifically activate SteD at the Golgi and track its subsequent fate. As expected, vesicles containing  
210 mEos-SteD travelled from the Golgi throughout the cell cytoplasm (Video S3 and Fig S6C). In contrast,  
211 vesicles containing the N-terminal truncation of SteD trafficked to the periphery of the cell, where the  
212 fluorescent signal dissipated (Video S3 and Fig S6C), presumably as a result of vesicle fusion and lateral  
213 dilution of the fluorescent signal in the PM. These results suggest the presence of a sorting signal in the  
214 N-terminal tail of SteD that directs traffic from the TGN to MHCII compartments and whose absence  
215 results in mis-trafficking to the PM.

216 There are two well-characterised sorting signals that interact with AP complexes: the tyrosine motif,  
217 YXX $\Phi$ , where  $\Phi$  is a large hydrophobic residue, and the dileucine motif, [DE]XXXL[LI], with one or more  
218 acidic residues upstream from two leucines (X indicates any residue in both motifs) (16). No series of  
219 residues in SteD match the consensus of either motif, however sequences resembling both motifs are  
220 present in inverted orientations in the N terminal tail. F32, N33, A34 and Y35 resemble an inverted  
221 tyrosine motif, and are within a region necessary for SteD function, as determined by alanine scanning  
222 mutagenesis (Region 7, Fig S1A) (4). A double alanine substitution of F32 and Y35 (SteD<sub>F32A,Y35A</sub>) was  
223 sufficient to inhibit the effect of SteD on mMHCII surface levels to the same level as SteD<sub>ala7</sub> following  
224 ectopic expression or translocation from *Salmonella* (Fig 7A and Fig S7A and B). Alanine substitution of  
225 the remaining residues within Region 7, N33 and G36, had no effect on SteD function (Fig S7A).  
226 However, the F32A,Y35A double mutation had no noticeable effect on the localisation of SteD (Fig S7C-  
227 E) and did not prevent interaction of SteD with AP1 when expressed ectopically (Fig S7F and G). This  
228 rules out the involvement of these residues in AP1-dependent transport and suggests that they  
229 contribute to SteD function in other ways.

230 Amino acids L13 and L14 of SteD, followed by P, P, S and then by two charged residues (E18, R19),  
231 resemble an inverted dileucine motif (Fig 7A). Alanine substitution of the leucines alone (SteD<sub>L13A,L14A</sub>-

232 HA) had no noticeable effect on localisation of SteD after translocation from *Salmonella* (Fig S7H).  
233 However, further alanine substitution of the two charged residues (E18 and R19) (SteD<sub>L13A,L14A,E18A,R19A</sub>-  
234 HA) significantly increased the proportion of HA signal at the cell surface (Fig 7B and C) and reduced  
235 the level of colocalisation with mMCHII (Figs 7B and D) when compared to wt SteD-HA. An increase in  
236 cell surface signal and decrease in colocalisation with mMCHII was also detected for ectopically  
237 expressed GFP-SteD<sub>L13A,L14A,E18A,R19A</sub> compared to wt GFP-SteD (Fig S7C-E). Therefore, this quadruple  
238 substitution mutation recapitulated the mis-localisation phenotype of the N-terminal truncation of  
239 GFP-SteD<sub>37-111</sub>. Furthermore, mMCHII surface levels were significantly higher after translocation of  
240 SteD<sub>L13A,L14A,E18A,R19A</sub>-HA compared to wt SteD-HA (Fig 7E). Mis-localisation of SteD<sub>L13A,L14A,E18A,R19A</sub> did not  
241 prevent interaction with TMEM127 (Fig S7F and G). This suggests that SteD interacts with TMEM127 at  
242 the ER, Golgi or TGN through which TMEM127 passes (17), and is consistent with other work showing  
243 that SteD can interact with TMEM127 in the absence of mMCHII (6). Finally, interaction between  
244 SteD<sub>L13A,L14A,E18A,R19A</sub> and AP1 was reduced significantly after translocation from *Salmonella* (Fig 7F and  
245 G) and ectopic expression (Fig S7F and G). Therefore, these residues are required for interaction with  
246 AP1, resulting in trafficking of SteD from the TGN to MCHII compartments, which is required for SteD  
247 function.

## 248 Discussion

249 Many bacterial type III secretion systems effectors are specifically targeted to organelles and  
250 membranes within the infected cell and interference with localisation processes frequently results in  
251 their loss of function (18–21). The targeting mechanisms of transmembrane effectors, which post-  
252 translationally integrate into specific host cell membranes, is not well understood. The majority of  
253 translocated SteD accumulates at the TGN but its substrates including mature MHCII are located in  
254 endosomal compartments and at the PM, raising the question of how SteD reaches these sites. In this  
255 work we used site directed mutagenesis of SteD to identify distinct regions of SteD that are required  
256 for initial targeting to the ER/Golgi, membrane integration and for AP1-mediated trafficking to MHCII  
257 compartments (Fig 8). This demonstrates how a bacterial virulence protein can enter the membrane  
258 network of the eukaryotic cell and hijack a vesicular trafficking pathway to regulate its localisation and  
259 ultimately its function.

260 Apart from SteD, a few other effectors have been reported to undergo integration into membranes of  
261 the secretory pathway. Tir, a conserved T3SS effector of pathogenic *E. coli* with a similar membrane  
262 topology to SteD, localises to the PM where it induces actin pedestals and enables tight attachment of  
263 extracellular bacteria by binding to the bacterial surface protein, Intimin (22). Enterohemorrhagic *E.*  
264 *coli* (EHEC) Tir was also shown to localise at the Golgi network by immunofluorescence and  
265 immunoelectron microscopy (23). Exposure of host cells to BFA prior to infection with EHEC prevented  
266 pedestal formation, suggesting that Tir, like SteD must first pass through the Golgi before reaching its  
267 site of action at the PM (23). NleA/Espl, another EHEC effector, contains two putative transmembrane  
268 domains and was shown by triton-dependent solubilisation following fractionation of infected host cells  
269 to integrate into membranes (24). NleA/Espl localises to the Golgi through interaction with the COPII  
270 component, Sec24 (25). This interaction stabilises COPII at the Golgi leading to a reduction in general  
271 protein secretion (26). Interestingly, overexpressed NleA interferes with MHCII invariant chain  
272 transport and it might thereby also affect antigen presentation (27).

273 Transmembrane effectors have been suggested to integrate into their target membranes either  
274 indirectly, by lateral transfer during translocation into the membrane containing the T3SS translocon,  
275 followed by membrane fission and vesicular trafficking to another destination, or directly, following  
276 translocation of the effector into the cytoplasm (3). In the case of SteD, indirect targeting could result  
277 from vesicles containing SteD trafficking from the SCV to the Golgi. However, direct integration is more  
278 likely for three reasons. First, ectopically expressed GFP-SteD mimics the bacterial translocated effector  
279 with respect to Golgi localisation, membrane integration and action on mMHCI (4), (and this work),  
280 showing that an SCV membrane and translocon are not required for these processes. Second, Golgi  
281 localisation is independent from membrane integration, as demonstrated by SteD mutants incapable  
282 of integration, showing that this localisation does not require vesicular trafficking. Third, mutants  
283 incapable of either membrane recruitment or integration accumulated within the host cell cytoplasm  
284 following translocation.

285 We propose that SteD is recruited to its target membrane from the cytoplasm through interaction of  
286 Region 9 with a protein or lipid, or a combination of components at the cytoplasmic face of the ER  
287 and/or the Golgi cisternae. Identification of the host interaction partner(s) and its involvement in  
288 membrane integration is needed to better define the process of SteD integration. Following  
289 recruitment, SteD undergoes membrane integration by a mechanism involving Region 13, and  
290 specifically S68 and G69. The ability of Region 13 to mediate integration of the transmembrane regions  
291 of SseG shows that this mechanism is non-specific. As glycine residues have a high propensity to induce  
292 a turn between two transmembrane helices (28), G69 could enable the formation of a hairpin-like  
293 structure and hence facilitate the conformation required for integration upon interaction with the  
294 membrane. A two-step membrane integration process is consistent with the mechanism of integration  
295 proposed for Tir, whereby a region close to the transmembrane domain binds peripherally to the  
296 membrane, resulting in a conformational change enabling the hydrophobic domains to adopt an  
297 orientation that drives membrane insertion (Race et al., 2006). Insertion of purified Tir into

298 reconstituted membrane vesicles does not require host proteins but does depend on sphingomyelin  
299 (29), which is made at the ER and Golgi and enriched at the PM (30).

300 Microscopic analysis of the non-membrane integrating SteD<sub>ala13</sub> mutant showed that it remained  
301 confined to the Golgi region, indicating that SteD must be in its membrane-integrated state to undergo  
302 onward post-TGN transport. SteD thus resembles transmembrane cargo proteins that are recognised  
303 for vesicular traffic by adaptor proteins via sorting signals in their cytoplasmic tails, such as the dileucine  
304 motif [DE]XXXL[LI]. It is therefore interesting that the LLPPSER sequence required for transport of SteD  
305 to MHCII compartments resembles an inverted dileucine motif. This could represent an example of  
306 effector mimicry by convergent evolution. However, individual substitution of either leucine inactivates  
307 mammalian [DE]XXXL[LI] sorting signals (12), whereas the localisation of the SteD<sub>L13A,L14A</sub>-HA double  
308 mutant was similar to that of wt SteD. Furthermore, although inverted leucine-containing motifs can  
309 mediate substrate recognition in other proteins (31) it is not clear whether SteD's LLPPSER sequence  
310 interacts directly with the AP1 binding site or whether other proteins are involved in the process.  
311 Further biochemical and structural studies are required to determine the molecular details of the  
312 SteD/AP1 interface.

313 Other intracellular pathogen proteins have been shown to interact with adaptor proteins through  
314 canonical dileucine motifs. The *Coxiella burnetii* T4SS effector CvpA interacts with AP2 via three  
315 dileucine motifs (EESKLL, RHINLL and EIQQLL) and re-routes endocytic compartments to the pathogen-  
316 containing vacuole (32). HIV-1 proteins Nef and Vpu interact with host adaptor protein complexes via  
317 ENTSL and ELSALV sequences respectively, resulting in the redistribution of cell surface proteins  
318 involved in cellular immunity (33,34). By re-routing protein cargo or trafficking pathways these proteins  
319 aid pathogen replication. On the other hand, by localising within membranes of the secretory pathway  
320 and by virtue of its LLPPSER post-TGN sorting sequence, SteD resembles classical transmembrane  
321 protein cargo.

322 Through interaction with AP1, SteD exploits an established host cell trafficking pathway between the  
323 TGN and endosomes (15,35). Indeed, AP1 mediates delivery of invariant chain-bound MHCII complexes  
324 from the TGN to MHCII compartments (36). Although blocking MHCII compartment localisation by  
325 expressing SteD after Golgi disruption totally prevented SteD function, disrupting its post-TGN traffic  
326 through mutation of the LLPPSER sequence or AP1 knockdown only partially disrupted or did not affect  
327 SteD function, respectively. It is possible that a small but functionally significant amount of SteD is still  
328 able to reach MHCII compartments in these conditions. Alternatively, in the case of SteD<sub>L13A,L14A,E18A,R19A</sub>,  
329 this could be due to the partial functionality of SteD at the PM, where it might also come into contact  
330 with mMHCII. The differences between AP1 knockdown and mutation of the dileucine sequence in  
331 relation to SteD localisation and functionality could be due to incomplete AP1 knockdown or to a  
332 redundancy in interaction of wt SteD with other adaptors.

333 The dependence on AP1 for trafficking to MHCII compartments might well create a rate-limiting step  
334 for post TGN SteD traffic, explaining the accumulation of SteD at the TGN. This might also provide a  
335 source of SteD to replenish that which is lost by degradation as a result of ubiquitination by the  
336 TMEM127/WWP2 machinery (6).

337 The mutational dissection of SteD described in this and our previous work enables the following  
338 functional regions of the protein to be defined: L13, L14, E18 and R19, an inverted dileucine motif-like  
339 sequence involved in post TGN transport to MHCII compartments (this work); K24 undergoes  
340 ubiquitination which contributes to the ability of SteD to induce ubiquitination of mMHCII (6); L42 and  
341 M43, recruitment to the ER/Golgi (this work); S68 and G69, integration into membranes (this work); 5  
342 – transmembrane regions, intramembrane interaction with TMEM127 (6); Residues in the C-terminal  
343 tail, interaction with MHCII (4). Taken together, this reveals a remarkable level of functional complexity  
344 within this small bacterial protein, resulting in the disruption of the adaptive immune response by  
345 reducing surface levels of at least three key proteins, CD97 (5), CD86/B7.2 (4) and mMHCII (4).



## 346 **Materials and Methods**

### 347 **Bacterial strains, plasmids and antibodies**

348 *Salmonella enterica* serovar Typhimurium (14028s) wild-type and all mutant strains are listed in Table  
349 S1. Bacteria were grown in Luria–Bertani (LB) medium supplemented with carbenicillin (50 µg ml<sup>-1</sup>) or  
350 kanamycin (50 µg ml<sup>-1</sup>) as appropriate. All plasmids used are listed in Table S2. All antibodies used are  
351 listed in Table S3.

### 352 **Cell culture and infection**

353 Human Mel Juso cells were maintained in Dulbecco's Modified Eagle Medium (DMEM, Sigma)  
354 containing 10% heat-inactivated fetal calf serum (FCS, Gibco) at 37°C in 5% CO<sub>2</sub>. When indicated, cells  
355 were incubated with DMEM containing MG132 (10 µM, Sigma) or DMSO as a vehicle control (1:1000)  
356 for 5 h. To disrupt the Golgi, cells were incubated in DMEM containing BFA (10 µg ml<sup>-1</sup>, Sigma) for 3 h.  
357 Mel Juso cells were infected for 30 min at MOI of 100 with late log-phase *Salmonella* grown in LB. Cells  
358 were washed twice with PBS and incubated in fresh medium containing gentamicin (100 µg ml<sup>-1</sup>) for 1  
359 h to kill extracellular bacteria. After 1 h, the antibiotic concentration was reduced to 20 µg ml<sup>-1</sup>, and the  
360 cells were processed 20 h post-invasion (p.i.).

361 For analysis of translocated effectors cells were lysed in 0.1% Triton X-100 and incubated on ice for 15  
362 min with vortexing. The post-nuclear supernatant (PNS) was separated from the nuclear pellet and non-  
363 lysed *Salmonella* cells by centrifugation.

### 364 **Transfection**

365 For transient plasmid transfections, plasmids and lipofectamine 2000 were combined and incubated in  
366 OptiMEM for 5 min at room temperature before being added to cells. Cells were analysed 16-20 h after  
367 plasmid transfection. For siRNA transfections, siRNA and Lipofectamine RNAiMAX (Life Technologies)  
368 were combined and incubated in OptiMEM for 5 min at room temperature before being added to cells.

369 AP1B1 siRNA mix (UAGACGAGCUUAUCUGCUA, CCACUCAGGACUCAGAUAA,  
370 GGAAGGCUGUGCGUGCUAU, CUAAGGACUUGGACUACUA), AP2M1 siRNA mix

371 (GUUAAGCGGUCCAACAUUU, GCGAGAGGGUAUCAAGUAU, AGUUUGAGCUUAUGAGGUA,  
372 GAACCGAAGCUGAACUACA), AP3D1 siRNA mix (CUACAGGGCUCUGGAUAAU,  
373 GGACGAGGCAAAAUACAUA, GAAGGACGUUCCCAUGGUA, CAAAGUCGAUGGCAUUCGG) and Scrambled  
374 siRNA mix (UGUUUACAUGUCGACUAA, UGUUUACAUGUUGUGUGA, UGUUUACAUGUUUUCUGA,  
375 UGUUUACAUGUUUCCUA) were purchased from Dharmacon and used at 5 pmol. Cells were diluted  
376 24 h after siRNA transfection and analysed 3 days after siRNA transfection.

### 377 **Induced expression of SteD**

378 To regulate GFP-SteD expression a Tet-on system was used. Mel Juso cells stably expressing the Tet  
379 Repressor from the pcDNA<sup>TM</sup> 6/TR vector (Life Technologies) were made following the manufacturer's  
380 instructions. The vector was linearised and transfected into Mel Juso cells as described above.  
381 Expressing cells were selected with 10 µg ml<sup>-1</sup> Blasticidin. A clonal population was selected based on  
382 maximum repressor expression. GFP-SteD was cloned into the pcDNA 4/TO vector (Life Technologies)  
383 following the manufacturer's instructions (Table S2) and transiently transfected into the repressor-  
384 expressing cells. Expression was induced with DMEM containing 1 µg ml<sup>-1</sup> doxycycline for 4 h.

### 385 **Flow cytometry**

386 Surface levels of mMHCII were measured following infection or transfection of Mel Juso cells as  
387 described previously (4) with minor modifications. In brief, Mel Juso cells were detached using 2 mM  
388 EDTA in PBS. All antibodies were diluted in FACS buffer (5% FCS and 1 mM EDTA in PBS). See Table S3  
389 for information on primary antibodies; secondary antibodies were purchased from Life Technologies,  
390 UK. Cells were labelled with mouse anti-HLA-DR (mMHCII) at 1:300 for 30 min on ice, washed in cold  
391 PBS, then labelled with Alexa Fluor 647 donkey anti-mouse at 1:300 for 30 min on ice. For detection of  
392 intracellular *Salmonella* and translocated HA-tagged SteD, cells were fixed in 3.7% paraformaldehyde  
393 for 1 h at room temperature and permeabilised with 0.1% Triton X-100 in FACS buffer for 10 min at  
394 room temperature. Subsequently, cells were labelled with goat anti-*Salmonella* CSA-1 at 1:500 and rat  
395 anti-HA at 1:200 antibodies for 30 min on ice. Cells were washed in cold PBS, then labelled with Alexa  
396 Fluor 555 donkey anti-goat and Alexa Fluor 488 donkey anti-rat antibodies both at 1:300 for 30 min on

397 ice. Surface levels of mMHCII were calculated as geometric mean of infected cells or GFP-positive  
398 cells/geometric mean of uninfected cells or GFP-negative cells x 100. Data were acquired using Calibur  
399 or Fortessa flow cytometer (BD Biosciences) and analysed using FlowJo v10 software.

## 400 **Membrane fractionation**

401 Mel Juso cells expressing GFP-tagged SteD variants or infected with *Salmonella* expressing HA-tagged  
402 SteD variants were collected and lysed in homogenization buffer (250 mM sucrose, 3 mM imidazole  
403 (pH 7.4), and 1 mM phenylmethylsulfonyl fluoride (PMSF)) by mechanical disruption using a Dounce  
404 homogenizer. The post-nuclear supernatant was collected after centrifugation at 1,800 *g* for 15 min  
405 and split into three samples. The membrane fraction was pelleted and separated from the soluble  
406 fraction in each sample by centrifugation at 100,000 *g* for 1 h at 4°C. One membrane pellet was used  
407 as the total membrane sample. To remove peripherally-associated proteins, the second membrane  
408 pellet was resuspended in 2.5 M urea and incubated for 15 min on ice followed by centrifugation at  
409 100,000 *g* for 1 h at 4°C. This yielded a pellet containing integral membrane proteins and a supernatant  
410 containing peripherally-associated membrane proteins. To solubilise integral membrane proteins the  
411 third membrane pellet was resuspended in RIPA buffer (150 mM NaCl, 1% Triton X-100, 0.5% sodium  
412 doxycholate, 0.1% SDS and 50 mM Tris-Cl (pH 8.0)) and incubated on ice for 15 min with vortexing  
413 followed by centrifugation at 100,000 *g* for 1 h at 4°C. This yielded a pellet containing protein  
414 aggregates and a supernatant containing integral membrane proteins. All samples were analysed by  
415 SDS PAGE and immunoblotting. The MHCII  $\alpha$  chain was used as an integral membrane protein control.  
416 Actin was used as a soluble protein control. Golgin-97 was used as a peripherally-associated membrane  
417 protein control.

## 418 **Immunofluorescence microscopy**

419 Cells were seeded onto coverslips and infected or transfected as described above. Cells were washed  
420 in PBS, fixed in 3% paraformaldehyde in PBS for 15 min at room temperature, then the  
421 paraformaldehyde was quenched by incubation with 50 mM NH<sub>4</sub>Cl for 10 min. All antibodies were  
422 diluted in 10% horse serum (Sigma) and 0.1% saponin (Sigma) in PBS. Coverslips were washed in 0.1%

423 saponin in PBS then incubated with appropriate primary antibodies for 1 h at room temperature,  
424 washed in 0.1% saponin in PBS, then incubated with secondary antibodies for 1 h at room temperature.  
425 Finally, coverslips were incubated with 0.5  $\mu\text{g ml}^{-1}$  DAPI (Invitrogen) for 5 min, washed in 0.1% saponin  
426 in PBS then mounted onto glass slides using Aqua-Poly/Mount (Polysciences, Inc.). See Table S3 for  
427 information on primary antibodies and dilutions used. Secondary antibodies were purchased from Life  
428 Technologies, UK.

### 429 **Confocal microscopy and live-cell imaging**

430 All coverslips were imaged at room temperature using a confocal laser scanning microscope (LSM 710,  
431 Carl Zeiss) equipped with a Plan Apochromat 63x (Carl Zeiss) oil-immersion objective. For live imaging,  
432 cells were seeded in dishes (Matek) with an embedded glass cover slip. Prior to imaging, DMEM was  
433 replaced with FluoroBrite (Gibco) containing 10% FCS (Gibco), 40 mM Hepes (Sigma) and 2 mM L-  
434 Glutamine (Sigma). Live cells were maintained at 37 °C in a heated chamber. Protein expression was  
435 blocked with cycloheximide (50  $\mu\text{g ml}^{-1}$ ) for 1 h before photobleaching. Photobleaching of GFP was  
436 performed using a 488 nm laser. Photoconversion of mEos was performed using a 405 nm laser.

### 437 **Image analysis**

438 Quantitative analyses of SteD at the TGN or plasma membrane were done using CellProfiler software  
439 (37). Nuclei were segmented from the DAPI signal. TGN objects were segmented using TGN46 labelling,  
440 and the outline of cells were segmented using background labelling from TGN46. Tertiary plasma  
441 membrane objects were segmented by expanding and shrinking the cell object by 4 pixels  
442 (corresponding to 0.5  $\mu\text{m}$ ) and then subtracting the shrunken cell from the expanded cell. Fluorescence  
443 intensity measurements were made after extracellular background subtraction using a rolling ball  
444 radius of 200 pixels (corresponding to 26.4  $\mu\text{m}$ ). Non-transfected or uninfected cells were excluded  
445 from the analysis based on a threshold. The mean intensity of the SteD signal was measured from TGN  
446 and plasma membrane segmentation masks. The  $\log_{10}$  of the ratio of the segmented signal over the  
447 total cellular signal was calculated for each cell.

448 Pearson's correlation coefficient was calculated using ImageJ software. The extracellular background  
449 was subtracted from images using the Background Subtraction function in ImageJ, with a rolling ball  
450 radius equal to 200 pixels or 26.4  $\mu\text{m}$ . Pearson's correlation coefficient values were obtained from  
451 individual cells using the Coloc 2 ImageJ plugin ([http://imagej.net/Coloc\\_2](http://imagej.net/Coloc_2)). Mander's overlap  
452 coefficient was calculated using ImageJ software to measure the proportion of colocalising pixels  
453 between two punctate signals. The extracellular background was subtracted from images as above.  
454 Local background was corrected by subtracting the median intensity of a 10 x 10 pixel region  
455 surrounding each pixel. Non-specific fluorescence was then subtracted using values measured from  
456 unlabelled cells. The images were then converted to binary and the Mander's overlap coefficient was  
457 measured from individual cells using the Coloc 2 imageJ plugin.

## 458 Immunoprecipitation

459 Mel Juso cells expressing GFP-tagged SteD variants or infected with *Salmonella* expressing HA-tagged  
460 SteD variants as indicated were harvested in cold PBS, washed and then resuspended in 2 mM  
461 dithiobis(succinimidyl propionate) (DSP) (Sigma) and incubated for 2 h at 4°C to crosslink intracellular  
462 proteins before cell lysis. Cells were pelleted and resuspended in 20 mM Tris (pH 8.0) for 15 min at  
463 room temperature to stop the crosslinking reaction. Cells were lysed in lysis buffer (5% glycerol, 0.5%  
464 Triton X-100, 1 mM PMSF in PBS) for 30 min at 4°C. The post-nuclear supernatant was obtained by  
465 centrifugation at 16,000  $g$  for 10 min. Proteins were immunoprecipitated by incubation with anti-HA  
466 sepharose beads (Pierce) or anti-GFP-Trap beads (ChromoTek) for 2 h at 4°C. Immunoprecipitates were  
467 washed four times with lysis buffer and boiled in SDS buffer containing 2.5%  $\beta$ -mercaptoethanol and  
468 400 mM DTT before analysis by SDS-PAGE and immunoblotting. Densitometry measurements were  
469 carried out using Image Lab software (Bio-Rad).

## 470 Acknowledgements

471 The authors would like to thank Teresa Thurston, Ondrej Cerny and Peter Hill for helpful comments  
472 on the manuscript. We are grateful to Jacques Neefjes for providing Mel Juso cells. mCherry-ER-3 was

473 a gift from Michael Davidson (Addgene plasmid 55041), mEos3.2-Tubulin-C-18 was a gift from  
474 Michael Davidson (Addgene plasmid 57484). This work was supported by an Investigator Award from  
475 the Wellcome Trust (209411/Z/17/Z) to D.W.H.

## 476 References

- 477 1. Escoll P, Mondino S, Rolando M, Buchrieser C. Targeting of host organelles by pathogenic  
478 bacteria: a sophisticated subversion strategy. *Nat Rev Microbiol*. 2016 Jan;14(1):5–19.
- 479 2. Hicks SW, Galán JE. Exploitation of eukaryotic subcellular targeting mechanisms by bacterial  
480 effectors. *Nat Rev Microbiol*. 2013 May;11(5):316–26.
- 481 3. Krampen L, Malmshemer S, Grin I, Trunk T, Lührmann A, de Gier J-W, et al. Revealing the  
482 mechanisms of membrane protein export by virulence-associated bacterial secretion systems.  
483 *Nat Commun*. 2018;9(1):3467.
- 484 4. Bayer-Santos E, Durkin CH, Rigano LA, Kupz A, Alix E, Cerny O, et al. The Salmonella Effector  
485 SteD Mediates MARCH8-Dependent Ubiquitination of MHC II Molecules and Inhibits T Cell  
486 Activation. *Cell Host Microbe*. 2016 Nov 9;20(5):584–95.
- 487 5. Cerny O, Godlee C, Tocci R, Cross NE, Shi H, Williamson JC, et al. CD97 stabilises the  
488 immunological synapse between dendritic cells and T cells and is targeted for degradation by  
489 the Salmonella effector SteD. *PLoS Pathog*. 2021;17(7):e1009771.
- 490 6. Alix E, Godlee C, Cerny O, Blundell S, Tocci R, Matthews S, et al. The Tumour Suppressor  
491 TMEM127 Is a Nedd4-Family E3 Ligase Adaptor Required by Salmonella SteD to Ubiquitinate  
492 and Degrade MHC Class II Molecules. *Cell Host Microbe*. 2020 Jul 8;28(1):54-68.e7.
- 493 7. Godlee C, Cerny O, Durkin CH, Holden DW. SrcA is a chaperone for the Salmonella SPI-2 type  
494 three secretion system effector SteD. *Microbiology*. 2019;165(1):15–25.
- 495 8. Kopito RR. Aggresomes, inclusion bodies and protein aggregation. *Trends Cell Biol*. 2000 Dec  
496 1;10(12):524–30.
- 497 9. Salcedo SP, Holden DW. SseG, a virulence protein that targets Salmonella to the Golgi  
498 network. *EMBO J*. 2003 Oct 1;22(19):5003–14.
- 499 10. Lippincott-Schwartz J, Yuan LC, Bonifacino JS, Klausner RD. Rapid redistribution of Golgi  
500 proteins into the ER in cells treated with brefeldin A: evidence for membrane cycling from  
501 Golgi to ER. *Cell*. 1989 Mar 10;56(5):801–13.
- 502 11. Wood SA, Park JE, Brown WJ. Brefeldin A causes a microtubule-mediated fusion of the trans-  
503 Golgi network and early endosomes. *Cell*. 1991 Nov 1;67(3):591–600.
- 504 12. Bonifacino JS, Traub LM. Signals for sorting of transmembrane proteins to endosomes and  
505 lysosomes. *Annu Rev Biochem*. 2003;72:395–447.
- 506 13. Stalder D, Gershlick DC. Direct trafficking pathways from the Golgi apparatus to the plasma  
507 membrane. *Semin Cell Dev Biol*. 2020;107(January):112–25.
- 508 14. Jafferli MH, Vijayaraghavan B, Figueroa RA, Crafoord E, Gudise S, Larsson VJ, et al. MCLIP, an  
509 effective method to detect interactions of transmembrane proteins of the nuclear envelope in  
510 live cells. *Biochim Biophys Acta*. 2014 Oct;1838(10):2399–403.
- 511 15. Hirst J, Borner GHH, Antrobus R, Peden AA, Hodson NA, Sahlender DA, et al. Distinct and  
512 overlapping roles for AP-1 and GGAs revealed by the “knocksideways” system. *Curr Biol*. 2012  
513 Sep 25;22(18):1711–6.
- 514 16. Robinson MS. Adaptable adaptors for coated vesicles. *Trends Cell Biol*. 2004 Apr;14(4):167–74.

- 515 17. Qin Y, Yao L, King EE, Buddavarapu K, Lenci RE, Chocron ES, et al. Germline mutations in  
516 TMEM127 confer susceptibility to pheochromocytoma. *Nat Genet.* 2010 Mar;42(3):229–33.
- 517 18. Boucrot E, Beuzón CR, Holden DW, Gorvel J-P, Méresse S. Salmonella typhimurium SifA  
518 effector protein requires its membrane-anchoring C-terminal hexapeptide for its biological  
519 function. *J Biol Chem.* 2003 Apr 18;278(16):14196–202.
- 520 19. Hicks SW, Charron G, Hang HC, Galán JE. Subcellular targeting of Salmonella virulence proteins  
521 by host-mediated S-palmitoylation. *Cell Host Microbe.* 2011 Jul 21;10(1):9–20.
- 522 20. Lau N, Haeberle AL, O’Keeffe BJ, Latomanski EA, Celli J, Newton HJ, et al. SopF, a  
523 phosphoinositide binding effector, promotes the stability of the nascent Salmonella-containing  
524 vacuole. *PLoS Pathog.* 2019;15(7):e1007959.
- 525 21. Salomon D, Guo Y, Kinch LN, Grishin N V., Gardner KH, Orth K. Effectors of animal and plant  
526 pathogens use a common domain to bind host phosphoinositides. *Nat Commun.* 2013;4:2973.
- 527 22. Frankel G, Phillips AD, Trabulsi LR, Knutton S, Dougan G, Matthews S. Intimin and the host cell-  
528 is it bound to end in Tir(s)? *Trends Microbiol.* 2001 May;9(5):214–8.
- 529 23. Mao C, Gu J, Wang H-G, Fang Y, Yang P, Tang B, et al. Translocation of enterohemorrhagic  
530 Escherichia coli effector Tir to the plasma membrane via host Golgi apparatus. *Mol Med Rep.*  
531 2017 Aug;16(2):1544–50.
- 532 24. Gruenheid S, Sekirov I, Thomas NA, Deng W, O’Donnell P, Goode D, et al. Identification and  
533 characterization of NleA, a non-LEE-encoded type III translocated virulence factor of  
534 enterohaemorrhagic Escherichia coli O157:H7. *Mol Microbiol.* 2004;51(5):1233–49.
- 535 25. Thanabalasuriar A, Bergeron J, Gillingham A, Mimee M, Thomassin J-L, Strynadka N, et al.  
536 Sec24 interaction is essential for localization and virulence-associated function of the bacterial  
537 effector protein NleA. *Cell Microbiol.* 2012 Aug;14(8):1206–18.
- 538 26. Kim J, Thanabalasuriar A, Chaworth-Musters T, Fromme JC, Frey EA, Lario PI, et al. The  
539 bacterial virulence factor NleA inhibits cellular protein secretion by disrupting mammalian  
540 COPII function. *Cell Host Microbe.* 2007 Sep 13;2(3):160–71.
- 541 27. Cloutier M, Gauthier C, Fortin JS, Genève L, Kim K, Gruenheid S, et al. ER egress of invariant  
542 chain isoform p35 requires direct binding to MHCII molecules and is inhibited by the NleA  
543 virulence factor of enterohaemorrhagic Escherichia coli. *Hum Immunol.* 2015;76(4):292–6.
- 544 28. Monné M, Hermansson M, von Heijne G. A turn propensity scale for transmembrane helices. *J*  
545 *Mol Biol.* 1999 Apr 23;288(1):141–5.
- 546 29. Race PR, Lakey JH, Banfield MJ. Insertion of the enteropathogenic Escherichia coli Tir virulence  
547 protein into membranes in vitro. *J Biol Chem.* 2006 Mar 24;281(12):7842–9.
- 548 30. Ridgway ND. Interactions between metabolism and intracellular distribution of cholesterol and  
549 sphingomyelin. *Biochim Biophys Acta.* 2000 Apr 12;1484(2–3):129–41.
- 550 31. Tintignac LA, Lagirand J, Batonnet S, Sirri V, Leibovitch MP, Leibovitch SA. Degradation of  
551 MyoD mediated by the SCF (MAFbx) ubiquitin ligase. *J Biol Chem.* 2005 Jan 28;280(4):2847–  
552 56.
- 553 32. Larson CL, Beare PA, Howe D, Heinzen RA. Coxiella burnetii effector protein subverts clathrin-  
554 mediated vesicular trafficking for pathogen vacuole biogenesis. *Proc Natl Acad Sci U S A.* 2013



- 555 Dec 3;110(49):E4770-9.
- 556 33. Chaudhuri R, Lindwasser OW, Smith WJ, Hurley JH, Bonifacino JS. Downregulation of CD4 by  
557 human immunodeficiency virus type 1 Nef is dependent on clathrin and involves direct  
558 interaction of Nef with the AP2 clathrin adaptor. *J Virol*. 2007 Apr;81(8):3877–90.
- 559 34. Jia X, Weber E, Tokarev A, Lewinski M, Rizk M, Suarez M, et al. Structural basis of HIV-1 Vpu-  
560 mediated BST2 antagonism via hijacking of the clathrin adaptor protein complex 1. *Elife*. 2014  
561 Apr 29;3(3):e02362.
- 562 35. Tan JZA, Gleeson PA. Cargo Sorting at the trans-Golgi Network for Shunting into Specific  
563 Transport Routes: Role of Arf Small G Proteins and Adaptor Complexes. *Cells*. 2019;8(6):531.
- 564 36. Neefjes J, Jongsma MLM, Paul P, Bakke O. Towards a systems understanding of MHC class I  
565 and MHC class II antigen presentation. *Nat Rev Immunol*. 2011 Nov 11;11(12):823–36.
- 566 37. Carpenter AE, Jones TR, Lamprecht MR, Clarke C, Kang IH, Friman O, et al. CellProfiler: image  
567 analysis software for identifying and quantifying cell phenotypes. *Genome Biol*.  
568 2006;7(10):R100.

569

## 570 Figure Legends

### 571 Fig 1 – Two regions of SteD are required for membrane integration

572 (A) Amino acid sequence of SteD showing predicted transmembrane domains. The N- and C-terminal  
573 residues are highlighted in blue and red respectively. The residues substituted to alanines in SteD<sub>ala9</sub>  
574 and SteD<sub>ala13</sub> mutants are highlighted in yellow and orange respectively.

575 (B) Protein immunoblots of whole-cell lysates derived from Mel JuSo cells expressing GFP-SteD (wt or  
576 mutants) and treated with MG132 or DMSO carrier. UB – ubiquitin.

577 (C) mMHCII surface levels of Mel JuSo cells expressing GFP or GFP-SteD (wt or mutants) and treated  
578 with MG132. Cells were analysed by flow cytometry and amounts of surface mMHCII in GFP-positive  
579 cells are expressed as a percentage of GFP-negative cells in the same sample. Mean of three  
580 independent experiments done in duplicate  $\pm$  SD. Data were analysed by one-way ANOVA followed by  
581 Dunnett's multiple comparison test, \*\*\*  $p < 0.001$ , n.s. – not significant.

582 (D) Protein immunoblots of membrane fractionation samples from Mel Juso cells expressing GFP-SteD  
583 (wt or mutants) and treated with MG132. Samples were taken from the pellet (P) and supernatant (S)  
584 of the total sample, after urea wash and after RIPA wash.

### 585 Fig 2 – Recruitment of SteD to the TGN is independent from membrane 586 integration

587 (A) Representative confocal immunofluorescence microscopy images of Mel JuSo cells expressing  
588 GFP-SteD (wt or mutants) after MG132 treatment. Cells were fixed and processed for  
589 immunofluorescence microscopy by labelling for the TGN (TGN46, red), and DNA (DAPI, blue). Scale  
590 bar – 10  $\mu$ m.

591 (B) Quantification of GFP at the TGN of cells represented in Fig 2A. The fluorescence intensity of the  
592 GFP signal at the TGN was measured in relation to total cellular fluorescence. Data are representative  
593 of three independent experiments. Each dot represents the value for one cell. Mean  $\pm$  SD. The  $\log_{10}$   
594 fold change of the data were analysed by one-way ANOVA followed by Dunnett's multiple comparison  
595 test, \*\*\*  $p < 0.001$ , \*  $p < 0.05$ .

596 (C) Schematic of SteD chimera with transmembrane domains of SseG.

597 (D) Protein immunoblots of membrane fractionation samples from Mel Juso cells expressing GFP-SteD  
598 (wt or chimeric mutants) and treated with MG132. Samples were taken from the pellet (P) and  
599 supernatant (S) of the total sample, after urea wash and after RIPA wash.

600 (E) Representative confocal immunofluorescence microscopy images of Mel JuSo cells expressing  
601 GFP-SteD (wt or chimeric mutants) and mCherry-SseG after MG132 treatment. Cells were fixed and  
602 processed for immunofluorescence microscopy by labelling for the TGN (TGN46, grey), and DNA  
603 (DAPI, blue). Scale bar – 10  $\mu$ m.

### 604 Fig 3 – Membrane integration following translocation

605 (A) Amino acid sequence of SteD showing predicted transmembrane domains. The N- and C-terminal  
606 residues are highlighted in blue and red respectively. The residues substituted to alanines in  
607 SteD<sub>L42A,M43A</sub> and SteD<sub>S68A,G69A</sub> mutants are highlighted in yellow and orange respectively.

608 (B) mMHCII surface levels of Mel JuSo cells infected with  $\Delta$ steD *Salmonella* carrying a plasmid  
609 expressing SteD-HA (wt or mutants) or SPI-2 null *ΔssaV Salmonella* and treated with MG132. Cells  
610 were analysed by flow cytometry and amounts of surface mMHCII in HA-positive cells are expressed  
611 as a percentage of HA-negative cells in the same sample. Mean of three independent experiments  
612 done in duplicate  $\pm$  SD. Data were analysed by one-way ANOVA followed by Dunnett's multiple  
613 comparison test, \*\*  $p < 0.01$ , n.s. – not significant.

614 (C) Protein immunoblots of membrane fractionation samples from Mel JuSo cells infected with  $\Delta$ steD  
615 *Salmonella* strains carrying a plasmid expressing SteD-HA (wt or mutants) and treated with MG132.  
616 Samples were taken from the pellet (P) and supernatant (S) of the total sample, after urea wash and  
617 after RIPA wash.

618 (D) Representative confocal immunofluorescence microscopy images of Mel JuSo cells infected with  
619  $\Delta$ steD *Salmonella* strains carrying a plasmid expressing SteD-HA (wt or mutants) and treated with  
620 MG132. Cells were fixed and processed for immunofluorescence microscopy by labelling for HA  
621 (green), the TGN (TGN46, red), and DNA (DAPI, blue). Arrowheads indicate cellular aggregates. Scale  
622 bar – 10  $\mu$ m.

623 (E) Quantification of HA signal at the TGN of cells represented in Fig 3D. The fluorescence intensity of  
624 the HA signal at the TGN was measured in relation to total cellular fluorescence. Data are  
625 representative of three independent experiments. Each dot represents the value for one cell. Mean  $\pm$   
626 SD. The  $\log_{10}$  fold change of the data were analysed by one-way ANOVA followed by Dunnett's  
627 multiple comparison test, \*\*\*  $p < 0.001$ .

#### 628 **Fig 4 – SteD integrates into membranes of the early secretory pathway**

629 (A) Representative confocal immunofluorescence microscopy images of Mel JuSo cells expressing  
630 GFP-SteD (wt or mutant) under a doxycycline-regulated promoter and the ER marker mCherry-ER-3.  
631 Cells were either treated with doxycycline plus MG132 (dox) or treated with BFA followed by  
632 doxycycline, MG132 and BFA (BFA-dox). Cells were then fixed and processed for immunofluorescence  
633 microscopy by labelling for the TGN (TGN46, grey), and DNA (DAPI, blue). Scale bar – 10  $\mu$ m.

634 (B) Quantification of cells represented in Fig 4A. Pearson's correlation coefficients for colocalization  
635 between GFP-SteD and mCherry-ER-3 or TGN46. Data are representative of three independent  
636 experiments. Each dot represents the value for one cell. Mean  $\pm$  SD. Data were analysed by paired t-  
637 test \*\*\*  $p < 0.001$ , \*\*  $p < 0.01$ .

638 (C) Protein immunoblots of membrane fractionation samples from Mel JuSo cells expressing GFP-SteD  
639 under a doxycycline-regulated promoter and treated as in Fig 4A. Samples were taken from the pellet  
640 (P) and supernatant (S) of the total sample, after urea wash and after RIPA wash.

641 (D) mMHCII surface levels of Mel JuSo cells expressing GFP-SteD under a doxycycline-regulated  
642 promoter or GFP and treated as in Fig 4A. Cells were analysed by flow cytometry and amounts of  
643 surface mMHCII in GFP-positive cells are expressed as a percentage of GFP-negative cells in the same

644 sample. Mean of three independent experiments done in duplicate  $\pm$  SD. Data were analysed by one-  
645 way ANOVA followed by Dunnett's multiple comparison test, \*\*  $p < 0.01$ , n.s. – not significant.

### 646 **Fig 5 – AP1 mediates post-TGN trafficking of SteD**

647 (A) Protein immunoblots of whole-cell lysates (Input) and immunoprecipitation with GFP-trap beads  
648 (GFP IP) from Mel JuSo cells expressing GFP-SteD or GFP-SseG following crosslinking with DSP. AP1 –  
649 antibody specific for the  $\gamma$  subunit, AP2 – antibody specific for the  $\alpha$  subunit, AP3 – antibody specific  
650 for the  $\delta$  subunit.

651 (B) Levels of immunoprecipitated AP1 were calculated by densitometry from immunoblots as  
652 represented in Fig 5A. Protein levels were normalised to GFP-SteD. Mean of three independent  
653 experiments  $\pm$  SD. The data were analysed by one sample t-test, \*\*  $p < 0.01$ .

654 (C) Protein immunoblots of Mel JuSo cells treated with scrambled siRNA (SCR) or siRNA specific to the  
655  $\beta$  subunit of AP1, the  $\mu$  subunit of AP2 or the  $\delta$  subunit of AP3. AP1 – antibody specific for the  $\beta$   
656 subunit, AP2 – antibody specific for the  $\alpha$  subunit AP3 – antibody specific for the  $\delta$  subunit.

657 (D) Representative confocal immunofluorescence microscopy images of Mel JuSo cells expressing  
658 GFP-SteD after treatment with scrambled siRNA (SCR) or siRNA specific to the  $\beta$  subunit of AP1. Cells  
659 were fixed and processed for immunofluorescence microscopy by labelling for MHCII compartments  
660 (mMHCII, red), and DNA (DAPI, blue). Arrowheads indicate MHCII compartments. Scale bar – 10  $\mu$ m.

661 (E) Mander's overlap coefficient of the fraction of GFP-SteD positive pixels that colocalise with  
662 mMHCII positive pixels from cells after treatment with siRNA as in Fig 5C and D. Data are  
663 representative of three independent experiments. Each dot represents the value for one cell. Mean  $\pm$   
664 SD. Data were analysed by one-way ANOVA followed by Dunnett's multiple comparison test, \*\*\*  
665  $p < 0.001$ , n.s. – not significant.

### 666 **Fig 6 – The N-terminal tail of SteD is required for trafficking to MHCII 667 compartments**

668 (A) Schematics of SteD showing predicted transmembrane domains and extent of truncation  
669 mutations as indicated.

670 (B) Protein immunoblots of membrane fractionation samples from Mel JuSo cells expressing GFP-SteD  
671 (wt or mutants). Samples were taken from the pellet (P) and supernatant (S) of the total sample, after  
672 urea wash and after RIPA wash.

673 (C) Representative confocal immunofluorescence microscopy images of Mel JuSo cells expressing  
674 GFP-SteD (wt or mutants). Cells were fixed and processed for immunofluorescence microscopy by  
675 labelling for MHCII compartments (mMHCII, red), the TGN (TGN46, grey), and DNA (DAPI, blue).  
676 Arrowheads indicate MHCII compartments. Scale bar – 10  $\mu$ m.

677 (D) Quantification of GFP at the surface of cells represented in Fig 6C. The fluorescence intensity of  
678 the GFP signal at the surface of cells was measured in relation to total cellular fluorescence. Data are  
679 representative of three independent experiments. Each dot represents the value for one cell. Mean  $\pm$   
680 SD. The  $\log_{10}$  fold change of the data were analysed by one-way ANOVA followed by Dunnett's  
681 multiple comparison test, \*\*\*  $p < 0.001$ , n.s. – not significant.

682 **Fig 7 – A dileucine motif-like sequence in the N-terminal tail of SteD mediates**  
683 **post-TGN trafficking**

684 (A) Amino acid sequence of SteD showing predicted transmembrane domains. The N- and C-terminal  
685 residues are highlighted in blue and red respectively. The residues substituted to alanines in  
686 SteD<sub>F32A,Y35A</sub> and SteD<sub>L13A,L14A,E18A,R19A</sub> are highlighted in grey and green respectively.

687 (B) Representative confocal immunofluorescence microscopy images of Mel Juso cells infected with  
688 *ΔsteD Salmonella* strains carrying a plasmid expressing SteD-HA (wt or mutant). Cells were fixed and  
689 processed for immunofluorescence microscopy by labelling for HA (green), MHCII compartments  
690 (mMHCII, red), and DNA (DAPI, blue). Arrowheads indicate MHCII compartments. Scale bar – 10 μm.

691 (C) Quantification of HA signal at the surface of cells represented in Fig 7B. The fluorescence intensity  
692 of the HA signal at the cell surface was measured in relation to total cellular fluorescence. Data are  
693 representative of three independent experiments. Each dot represents the value for one cell. Mean ±  
694 SD. The log<sub>10</sub> fold change of the data were analysed by t-test, \*\*\* p<0.001.

695 (D) Mander's overlap coefficient of the fraction of SteD-HA positive pixels that colocalise with mMHCII  
696 positive pixels from cells as represented in Fig 7B. Data are representative of three independent  
697 experiments. Each dot represents the value for one cell. Mean ± SD. Data were analysed by t-test, \*\*\*  
698 p<0.001.

699 (E) mMHCII surface of Mel Juso cells infected with *ΔsteD Salmonella* carrying a plasmid expressing  
700 SteD-HA (wt or mutant). Cells were analysed by flow cytometry and amounts of surface mMHCII in  
701 infected cells are expressed as a percentage of uninfected cells in the same sample. Mean of three  
702 independent experiments done in duplicate ± SD. Data were analysed by paired t-test, \* p<0.05.

703 (F) Protein immunoblots of whole-cell lysates (Input) and immunoprecipitation with HA beads (HA IP)  
704 from Mel Juso cells infected with *ΔsteD Salmonella* strains carrying a plasmid expressing SteD-HA (wt  
705 or mutant) or SseF-HA following crosslinking with DSP. Mutation of charged residues might explain the  
706 difference in migration through the SDS gel. AP1 – antibody specific for the γ subunit, AP2 – antibody  
707 specific for the α subunit, AP3 – antibody specific for the δ subunit.

708 (G) Levels of immunoprecipitated AP1 were calculated by densitometry from immunoblots as  
709 represented in Fig 7F. Protein levels were normalised to wt SteD-HA. Mean of three independent  
710 experiments ± SD. The data were analysed by one sample t-test, \*\*\* p<0.001, n.s. – not significant.

711 **Fig 8 – Model of SteD membrane integration and localisation**

712 Following translocation from Salmonella (green) into the cytoplasm SteD (orange) is recruited to the  
713 membranes of the early secretory pathway where it integrates. SteD then migrates to and  
714 accumulates within the TGN. Through interaction with the AP1 complex (pink) it is trafficked to MHCII  
715 compartments, where it interacts with mMHCII (dark green), which is ubiquitinated through the  
716 actions of TMEM127 (brown) and WWP2 (red) causing a reduction in mMHCII surface levels.

717 SteD<sub>L42A,M43A</sub> mutation prevents membrane recruitment leading to aggregation in the cytoplasm.  
718 SteD<sub>S68A,G69A</sub> mutation prevents membrane integration resulting in a Golgi-associated non-integrative  
719 state. SteD<sub>L13A,L14A,E18A,R19A</sub> mutation prevents AP1 interaction leading to mis-trafficking of SteD to the  
720 plasma membrane.

## 721 Supporting Information

### 722 Fig S1

723 (A) Amino acid sequence of SteD showing regions of amino acids substituted to alanine  
724 scanning mutagenesis.

725 (B) Representative flow cytometry plots showing the gating strategy for GFP-positive cells and  
726 negative cells as used for Fig 1C.

727 (C) mMHCII surface levels of Mel JuSo cells expressing GFP or GFP-SteD and treated with DMSO or  
728 MG132 were measured by flow cytometry. Mean of three independent experiments done in  
729 duplicate  $\pm$  SD. Data were analysed by paired t-test, \*\*  $p < 0.01$ , n.s. – not significant.

### 730 Fig S2

731 (A) Representative confocal immunofluorescence microscopy images of Mel JuSo cells expressing  
732 GFP-SteD (wt or mutants) after MG132 treatment. Cells were fixed and processed for  
733 immunofluorescence microscopy by labelling for ubiquitin (UB, red), and DNA (DAPI, blue).  
734 Arrowheads indicate cellular aggregates. Scale bar – 10  $\mu$ m.

### 735 Fig S3

736 (A and D) Protein immunoblots of whole-cell lysates (WCL) and post-nuclear supernatant (PNS) of Mel  
737 Juso cells infected with  *$\Delta$ steD Salmonella* strains carrying a plasmid expressing SteD-HA (wt or  
738 mutants) and treated with MG132 or DMSO carrier. Actin and DnaK represent host cell and  
739 *Salmonella* loading controls respectively.

740 (B and C) mMHCII surface levels of Mel JuSo cells expressing GFP or GFP-SteD (wt or mutants) and  
741 treated with MG132. Cells were analysed by flow cytometry and amounts of surface mMHCII in GFP-  
742 positive cells are expressed as a percentage of GFP-negative cells in the same sample. Mean of three  
743 independent experiments done in duplicate  $\pm$  SD. Data were analysed by one-way ANOVA followed by  
744 Dunnett's multiple comparison test in comparison to wt SteD, \*\*\*  $p < 0.001$ , \*\*  $p < 0.01$ , \*  $p < 0.05$ , n.s.  
745 – not significant.

746 (E) Representative flow cytometry plots showing the gating strategy for HA-positive and negative cells  
747 as used for Fig 3B.

### 748 Fig S4

749 (A) Representative confocal immunofluorescence microscopy images of Mel JuSo cells expressing  
750 GFP-SteD under a doxycycline-regulated promoter. Cells were either treated with doxycycline for 4 h  
751 (dox) or treated with BFA for 3 h followed by doxycycline and BFA for 4 h (BFA-dox). Cells were then  
752 fixed and processed for immunofluorescence microscopy by labelling for MHCII compartments  
753 (mMHCII, red), the TGN (TGN46, grey), and DNA (DAPI, blue). Arrowheads indicate MHCII  
754 compartments. Scale bar – 10  $\mu$ m.

755 (B) Representative flow cytometry plots showing the gating strategy for GFP-positive and negative  
756 cells as used for Fig 4D.

757 (C) Confocal microscopy images demonstrating photobleaching of a Mel JuSo cell expressing GFP-  
758 SteD from Video S2. Closed arrowheads indicate anterograde vesicle traffic from the Golgi region.  
759 Barbed arrowhead indicates retrograde vesicle traffic. Scale bar – 10  $\mu$ m.

## 760 Fig S5

761 (A) mMHCII surface levels of Mel JuSo cells expressing GFP-SteD and treated with scrambled siRNA  
762 (SCR) or siRNA specific to the  $\beta$  subunit of AP1. Cells were analysed by flow cytometry and amounts of  
763 surface mMHCII in GFP-positive cells are expressed as a percentage of GFP-negative cells in the same  
764 sample. Mean of three independent experiments done in duplicate  $\pm$  SD. Data were analysed by one-  
765 way ANOVA followed by Dunnett's multiple comparison test n.s. – not significant.

766 (B) Quantification of GFP at the surface of cells represented in Fig 5D. The fluorescence intensity of  
767 the GFP signal at the surface of cells was measured in relation to total cellular fluorescence. Data are  
768 representative of three independent experiments. Each dot represents the value for one cell. Mean  $\pm$   
769 SD. The  $\log_{10}$  fold change of the data were analysed by t-test, n.s. – not significant.

## 770 Fig S6

771 (A) Protein immunoblots of Mel JuSo cells expressing GFP or GFP-SteD (wt or mutants).

772 (B) Quantification of GFP at the TGN of cells represented in Fig 6C. The fluorescence intensity of the  
773 GFP signal at the TGN was measured in relation to total cellular fluorescence. Data are representative  
774 of three independent experiments. Each dot represents the value for one cell. Mean  $\pm$  SD. The  $\log_{10}$   
775 fold change of the data were analysed by one-way ANOVA followed by Dunnett's multiple comparison  
776 test, \*\*\*  $p < 0.001$ , n.s. – not significant.

777 (C) Confocal microscopy images demonstrating photoactivation of a Mel JuSo cell expressing mEos-  
778 SteD (wt or 37-111) from Video S3. Red dotted circles indicate photo-activated areas. Red arrowheads  
779 indicate Golgi-derived vesicles. Scale bar – 10  $\mu$ m.

## 780 Fig S7

781 (A) mMHCII surface levels of Mel JuSo cells expressing GFP or GFP-SteD (wt or mutants). Cells were  
782 analysed by flow cytometry and amounts of surface mMHCII in GFP-positive cells are expressed as a  
783 percentage of GFP negative cells in the same sample. Mean of three independent experiments done  
784 in duplicate  $\pm$  SD. Data were analysed by one-way ANOVA followed by Dunnett's multiple comparison  
785 test compared to wt SteD, \*\*\*  $p < 0.001$ , \*\*  $p < 0.01$ , n.s. – not significant.

786 (B) mMHCII surface of Mel Juso cells infected with  $\Delta$ steD *Salmonella* carrying a plasmid expressing SteD-  
787 HA (wt or mutant). Cells were analysed by flow cytometry and amounts of surface mMHCII in infected  
788 cells are expressed as a percentage of uninfected cells in the same sample. Mean of three independent  
789 experiments done in duplicate  $\pm$  SD. Data were analysed by one-way ANOVA followed by Dunnett's  
790 multiple comparison test, \*\*\*  $p < 0.001$ , n.s. – not significant.

791 (C) Representative confocal immunofluorescence microscopy images of Mel JuSo cells expressing  
792 GFP-SteD (wt or mutants). Cells were fixed and processed for immunofluorescence microscopy by  
793 labelling for MHCII compartments (mMHCII, red), the TGN (TGN46, grey), and DNA (DAPI, blue).  
794 Arrowheads indicate MHCII compartments. Scale bar – 10  $\mu$ m.

795 (D) Quantification of GFP at the surface of cells represented in Fig S7C. The fluorescence intensity of  
796 the GFP signal at the cell surface was measured in relation to total cellular fluorescence. Data are  
797 representative of three independent experiments. Each dot represents the value for one cell. Mean  $\pm$   
798 SD. The  $\log_{10}$  fold change of the data were analysed by one-way ANOVA followed by Dunnett's  
799 multiple comparison test, \*\*\*  $p < 0.001$ , n.s. – not significant.

800 (E) Mander's overlap coefficient of the fraction of GFP-SteD positive pixels that colocalise with  
801 mMHCII positive pixels from cells as represented in Fig S7C. Data are representative of three  
802 independent experiments. Each dot represents the value for one cell. Mean  $\pm$  SD. Data were analysed  
803 by one-way ANOVA followed by Dunnett's multiple comparison test, \*\*\*  $p < 0.001$ , n.s. – not  
804 significant.

805 (F) Protein immunoblots of whole-cell lysates (Input) and immunoprecipitation with GFP-trap beads  
806 (GFP IP) from Mel Juso cells expressing GFP-SteD (wt or mutants) or GFP-SseG following crosslinking  
807 with DSP. Mutation of charged residues might explain the difference in migration through the SDS gel.  
808 AP1 – antibody specific for the  $\gamma$  subunit, AP2 – antibody specific for the  $\alpha$  subunit, AP3 – antibody  
809 specific for the  $\delta$  subunit.

810 (G) Levels of immunoprecipitated AP1 and TMEM127 were calculated by densitometry from  
811 immunoblots as represented in Fig S7F. Protein levels were normalised to GFP-SteD. Mean of three  
812 independent experiments  $\pm$  SD. The data were analysed by one sample t-test, \*\*\*  $p < 0.001$ , \*  $p < 0.05$ ,  
813 n.s. – not significant.

814 (H) Representative confocal immunofluorescence microscopy images of Mel Juso cells infected with  
815  $\Delta steD$  *Salmonella* strains carrying a plasmid expressing SteD-HA (wt or mutant). Cells were fixed and  
816 processed for immunofluorescence microscopy by labelling for HA (green), the TGN (TGN46, red), and  
817 DNA (DAPI, blue). Scale bar – 10  $\mu\text{m}$ .

### 818 **Video S1**

819 Time-lapse microscopy of Mel JuSo cells expressing GFP-SteD (wt or mutant) treated with MG132.  
820 Scale bar – 10  $\mu\text{m}$ .

### 821 **Video S2**

822 Time-lapse microscopy of Mel JuSo cells expressing GFP-SteD following photobleaching of non-Golgi  
823 regions. Scale bar – 10  $\mu\text{m}$ .

### 824 **Video S3**

825 Time-lapse microscopy of Mel JuSo cells expressing mEos-SteD (wt or mutant) following activation of  
826 mEos in Golgi regions. Scale bar – 10  $\mu\text{m}$ .

### 827 **Table S1 – *S. Typhimurium* strains used in this study**

### 828 **Table S2 – Plasmids used in this study**

### 829 **Table S3 – Primary antibodies used in this study**



## Fig 1

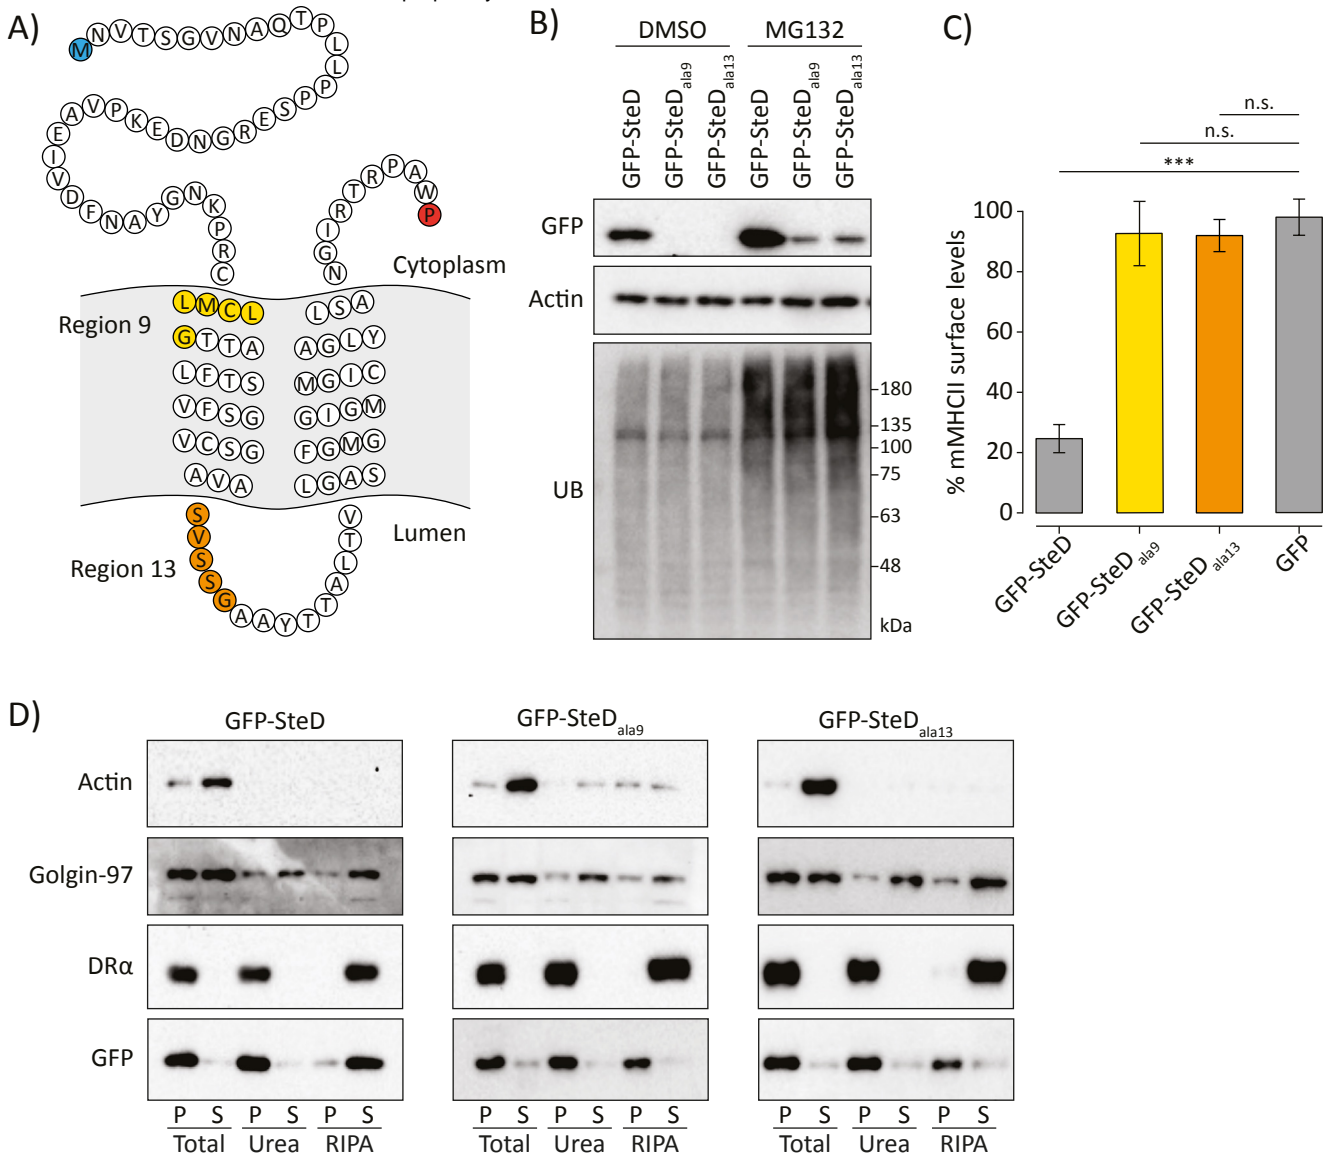

### Fig 1 – Two regions of SteD are required for membrane integration

(A) Amino acid sequence of SteD showing predicted transmembrane domains. The N- and C-terminal residues are highlighted in blue and red respectively. The residues substituted to alanines in SteD<sub>ala9</sub> and SteD<sub>ala13</sub> mutants are highlighted in yellow and orange respectively.

(B) Protein immunoblots of whole-cell lysates derived from Mel JuSo cells expressing GFP-SteD (wt or mutants) and treated with MG132 or DMSO carrier. UB – ubiquitin.

(C) mMHCII surface levels of Mel JuSo cells expressing GFP or GFP-SteD (wt or mutants) and treated with MG132. Cells were analysed by flow cytometry and amounts of surface mMHCII in GFP-positive cells are expressed as a percentage of GFP-negative cells in the same sample. Mean of three independent experiments done in duplicate  $\pm$  SD. Data were analysed by one-way ANOVA followed by Dunnett's multiple comparison test, \*\*\*  $p < 0.001$ , n.s. – not significant.

(D) Protein immunoblots of membrane fractionation samples from Mel JuSo cells expressing GFP-SteD (wt or mutants) and treated with MG132. Samples were taken from the pellet (P) and supernatant (S) of the total sample, after urea wash and after RIPA wash.

Fig 2

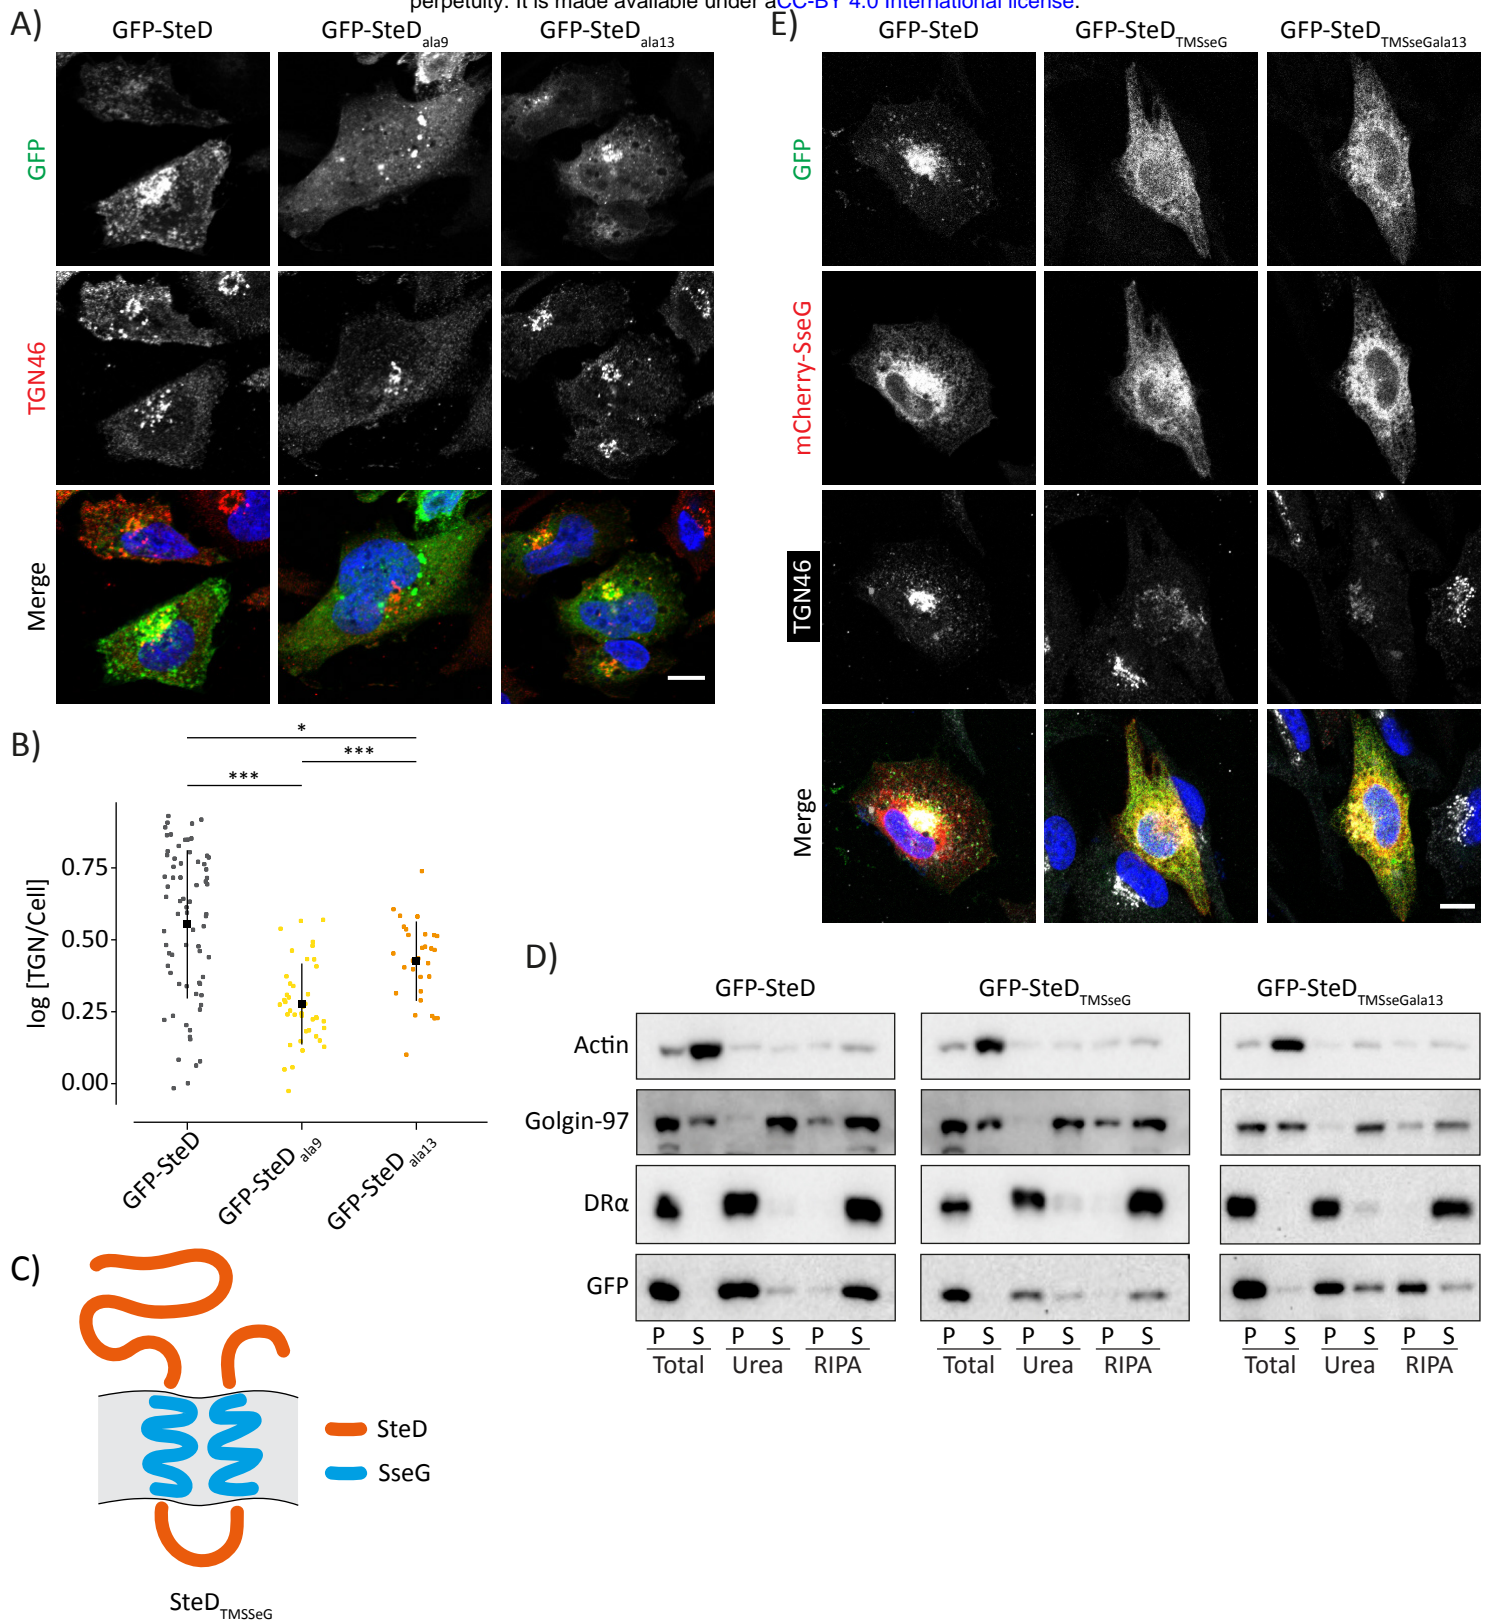

**Fig 2 – Recruitment of SteD to the TGN is independent from membrane integration**

(A) Representative confocal immunofluorescence microscopy images of Mel JuSo cells expressing GFP-SteD (wt or mutants) after MG132 treatment. Cells were fixed and processed for immunofluorescence microscopy by labelling for the TGN (TGN46, red), and DNA (DAPI, blue). Scale bar – 10  $\mu$ m.

(B) Quantification of GFP at the TGN of cells represented in Fig 2A. The fluorescence intensity of the GFP signal at the TGN was measured in relation to total cellular fluorescence. Data are representative of three independent experiments. Each dot represents the value for one cell. Mean  $\pm$  SD. The  $\log_{10}$  fold change of the data were analysed by one-way ANOVA followed by Dunnett’s multiple comparison test, \*\*\*  $p < 0.001$ , \*  $p < 0.05$ .

(C) Schematic of SteD chimera with transmembrane domains of SseG.

(D) Protein immunoblots of membrane fractionation samples from Mel JuSo cells expressing GFP-SteD (wt or chimeric mutants) and treated with MG132. Samples were taken from the pellet (P) and supernatant (S) of the total sample, after urea wash and after RIPA wash.

(E) Representative confocal immunofluorescence microscopy images of Mel JuSo cells expressing GFP-SteD (wt or chimeric mutants) and mCherry-SseG after MG132 treatment. Cells were fixed and processed for immunofluorescence microscopy by labelling for the TGN (TGN46, grey), and DNA (DAPI, blue). Scale bar – 10  $\mu$ m.

### Fig 3

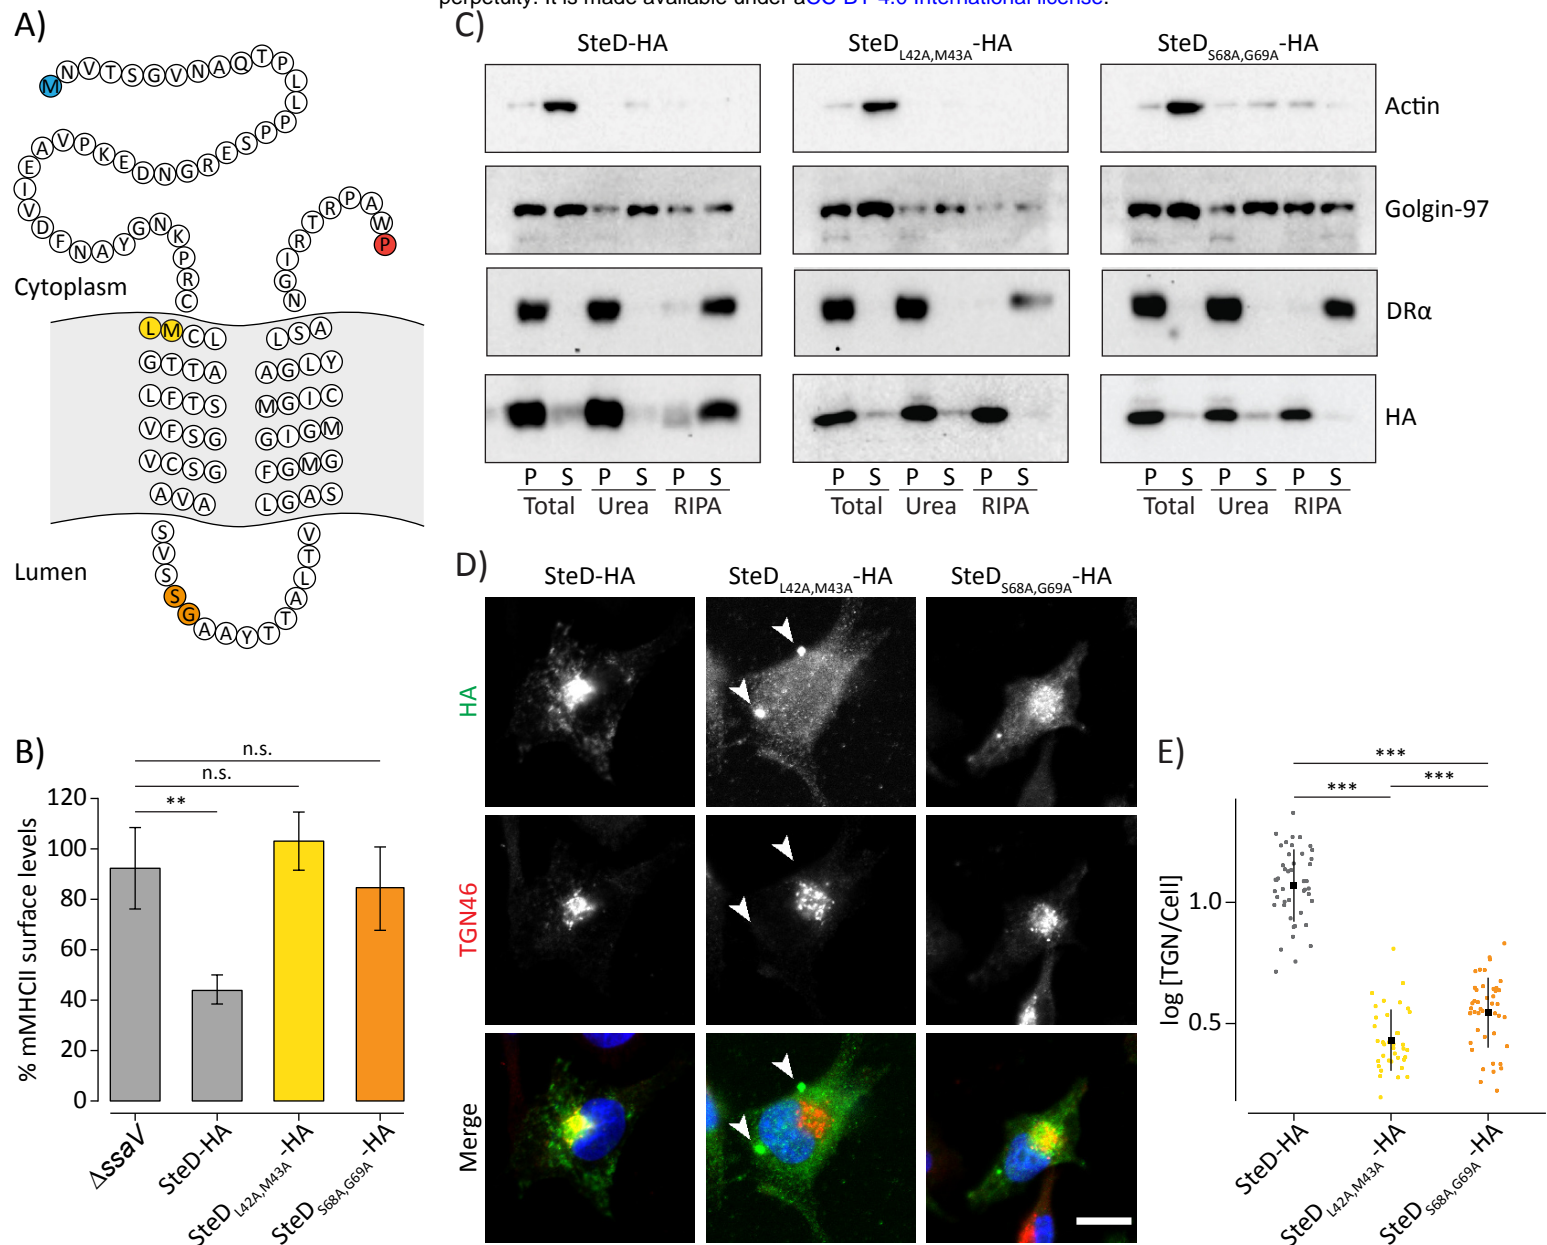

### Fig 3 – Membrane integration following translocation

(A) Amino acid sequence of SteD showing predicted transmembrane domains. The N- and C-terminal residues are highlighted in blue and red respectively. The residues substituted to alanines in SteD<sub>L42A,M43A</sub> and SteD<sub>S68A,G69A</sub> mutants are highlighted in yellow and orange respectively.

(B) mMHCII surface levels of Mel JuSo cells infected with  $\Delta steD$  *Salmonella* carrying a plasmid expressing SteD-HA (wt or mutants) or SPI-2 null  $\Delta ssaV$  *Salmonella* and treated with MG132. Cells were analysed by flow cytometry and amounts of surface mMHCII in HA-positive cells are expressed as a percentage of HA-negative cells in the same sample. Mean of three independent experiments done in duplicate ± SD. Data were analysed by one-way ANOVA followed by Dunnett's multiple comparison test, \*\* p<0.01, n.s. – not significant.

(C) Protein immunoblots of membrane fractionation samples from Mel JuSo cells infected with  $\Delta steD$  *Salmonella* strains carrying a plasmid expressing SteD-HA (wt or mutants) and treated with MG132. Samples were taken from the pellet (P) and supernatant (S) of the total sample, after urea wash and after RIPA wash.

(D) Representative confocal immunofluorescence microscopy images of Mel JuSo cells infected with  $\Delta steD$  *Salmonella* strains carrying a plasmid expressing SteD-HA (wt or mutants) and treated with MG132. Cells were fixed and processed for immunofluorescence microscopy by labelling for HA (green), the TGN (TGN46, red), and DNA (DAPI, blue). Arrowheads indicate cellular aggregates. Scale bar – 10  $\mu$ m.

(E) Quantification of HA signal at the TGN of cells represented in Fig 3D. The fluorescence intensity of the HA signal at the TGN was measured in relation to total cellular fluorescence. Data are representative of three independent experiments. Each dot represents the value for one cell. Mean ± SD. The log<sub>10</sub> fold change of the data were analysed by one-way ANOVA followed by Dunnett's multiple comparison test, \*\*\* p<0.001.

**Fig 4**

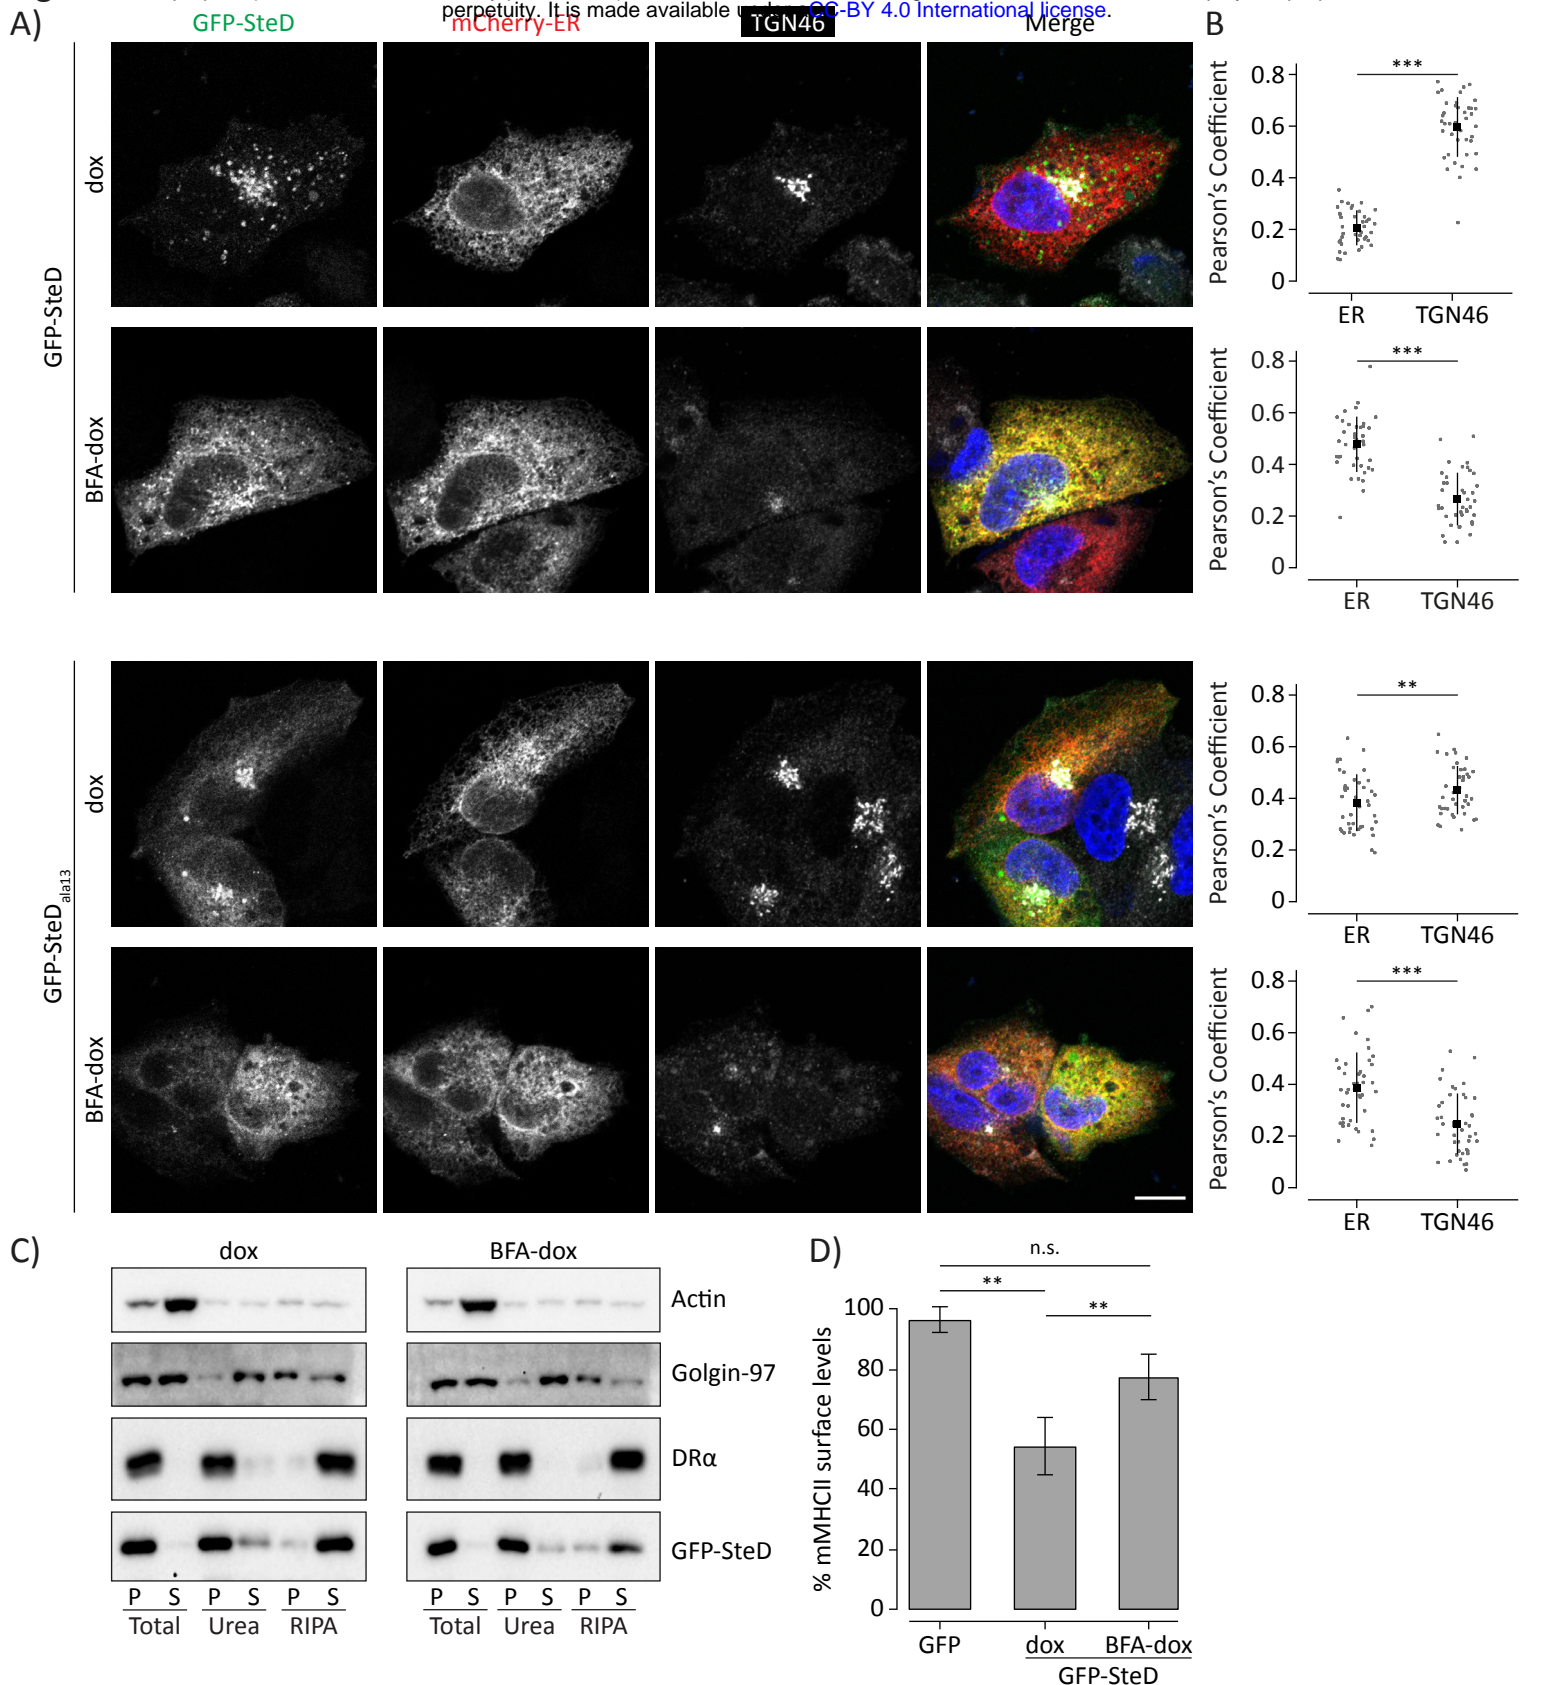

**Fig 4 – SteD integrates into membranes of the early secretory pathway**

(A) Representative confocal immunofluorescence microscopy images of Mel JuSo cells expressing GFP-SteD (wt or mutant) under a doxycycline-regulated promoter and the ER marker mCherry-ER-3. Cells were either treated with doxycycline plus MG132 (dox) or treated with BFA followed by doxycycline, MG132 and BFA (BFA-dox). Cells were then fixed and processed for immunofluorescence microscopy by labelling for the TGN (TGN46, grey), and DNA (DAPI, blue). Scale bar – 10  $\mu$ m.

(B) Quantification of cells represented in Fig 4A. Pearson's correlation coefficients for colocalization between GFP-SteD and mCherry-ER-3 or TGN46. Data are representative of three independent experiments. Each dot represents the value for one cell. Mean  $\pm$  SD. Data were analysed by paired t-test \*\*\*  $p < 0.001$ , \*\*  $p < 0.01$ .

(C) Protein immunoblots of membrane fractionation samples from Mel JuSo cells expressing GFP-SteD under a doxycycline-regulated promoter and treated as in Fig 4A. Samples were taken from the pellet (P) and supernatant (S) of the total sample, after urea wash and after RIPA wash.

(D) mMHCII surface levels of Mel JuSo cells expressing GFP-SteD under a doxycycline-regulated promoter or GFP and treated as in Fig 4A. Cells were analysed by flow cytometry and amounts of surface mMHCII in GFP-positive cells are expressed as a percentage of GFP-negative cells in the same sample. Mean of three independent experiments done in duplicate  $\pm$  SD. Data were analysed by one-way ANOVA followed by Dunnett's multiple comparison test, \*\*  $p < 0.01$ , n.s. – not significant.

**Fig 5**

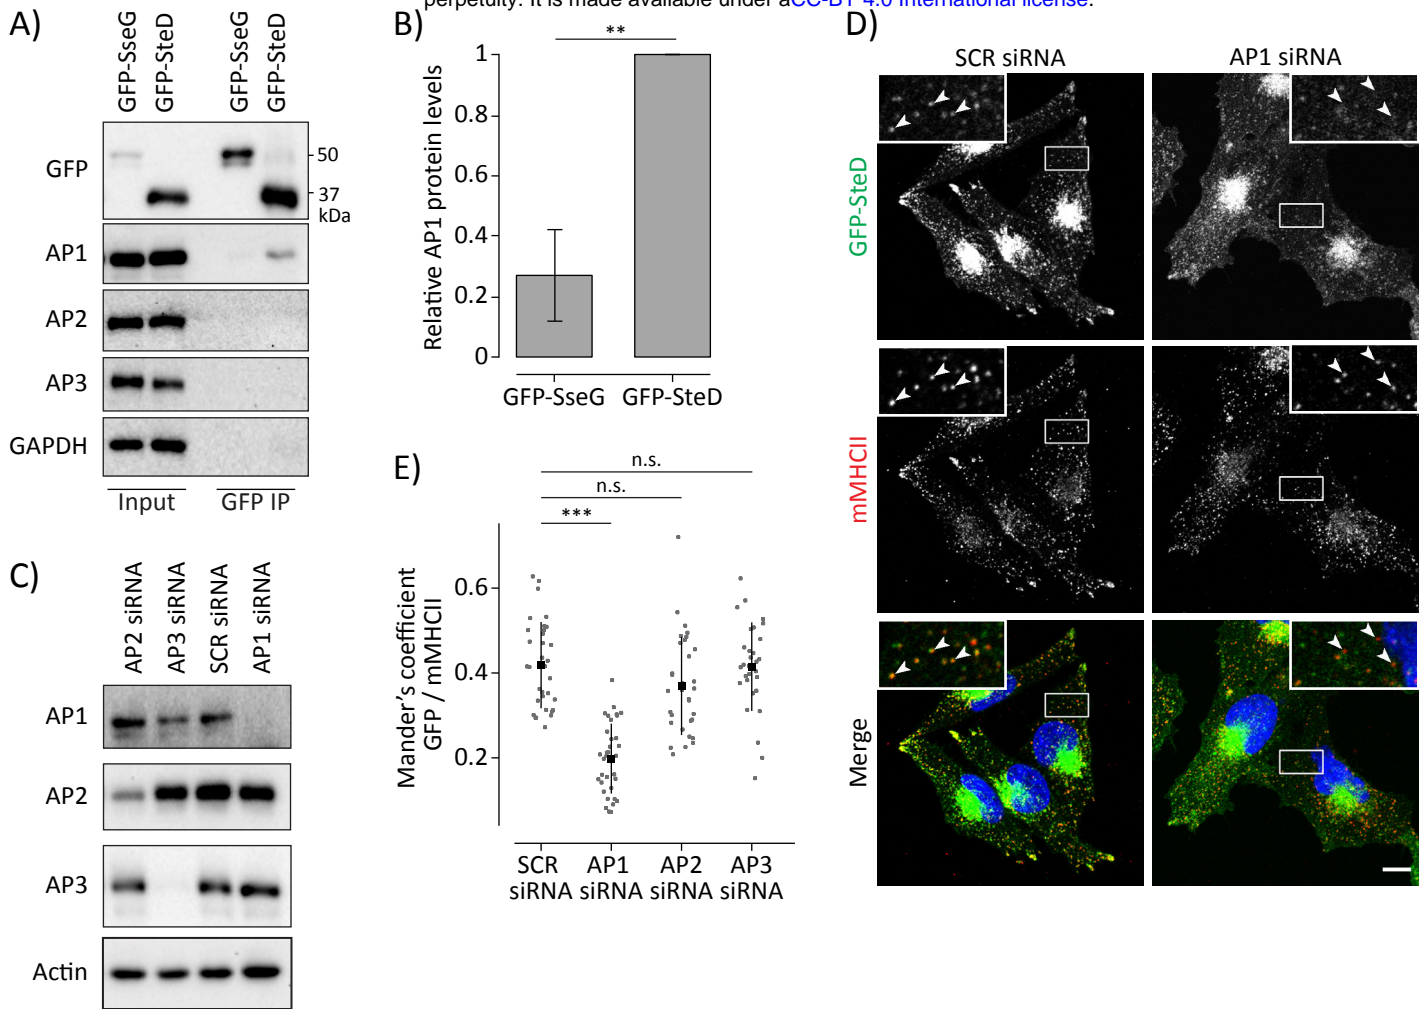

**Fig 5 – AP1 mediates post-TGN trafficking of SteD**

(A) Protein immunoblots of whole-cell lysates (Input) and immunoprecipitation with GFP-trap beads (GFP IP) from Mel JuSo cells expressing GFP-SteD or GFP-SseG following crosslinking with DSP. AP1 – antibody specific for the  $\gamma$  subunit, AP2 – antibody specific for the  $\alpha$  subunit, AP3 – antibody specific for the  $\delta$  subunit.

(B) Levels of immunoprecipitated AP1 were calculated by densitometry from immunoblots as represented in Fig 5A. Protein levels were normalised to GFP-SteD. Mean of three independent experiments  $\pm$  SD. The data were analysed by one sample t-test, \*\*  $p < 0.01$ .

(C) Protein immunoblots of Mel JuSo cells treated with scrambled siRNA (SCR) or siRNA specific to the  $\beta$  subunit of AP1, the  $\mu$  subunit of AP2 or the  $\delta$  subunit of AP3. AP1 – antibody specific for the  $\beta$  subunit, AP2 – antibody specific for the  $\alpha$  subunit AP3 – antibody specific for the  $\delta$  subunit.

(D) Representative confocal immunofluorescence microscopy images of Mel JuSo cells expressing GFP-SteD after treatment with scrambled siRNA (SCR) or siRNA specific to the  $\beta$  subunit of AP1. Cells were fixed and processed for immunofluorescence microscopy by labelling for MHCII compartments (mMHCII, red), and DNA (DAPI, blue). Arrowheads indicate MHCII compartments. Scale bar – 10  $\mu\text{m}$ .

(E) Mander's overlap coefficient of the fraction of GFP-SteD positive pixels that colocalise with mMHCII positive pixels from cells after treatment with siRNA as in Fig 5C and D. Data are representative of three independent experiments. Each dot represents the value for one cell. Mean  $\pm$  SD. Data were analysed by one-way ANOVA followed by Dunnett's multiple comparison test, \*\*\*  $p < 0.001$ , n.s. – not significant.

**Fig 6**

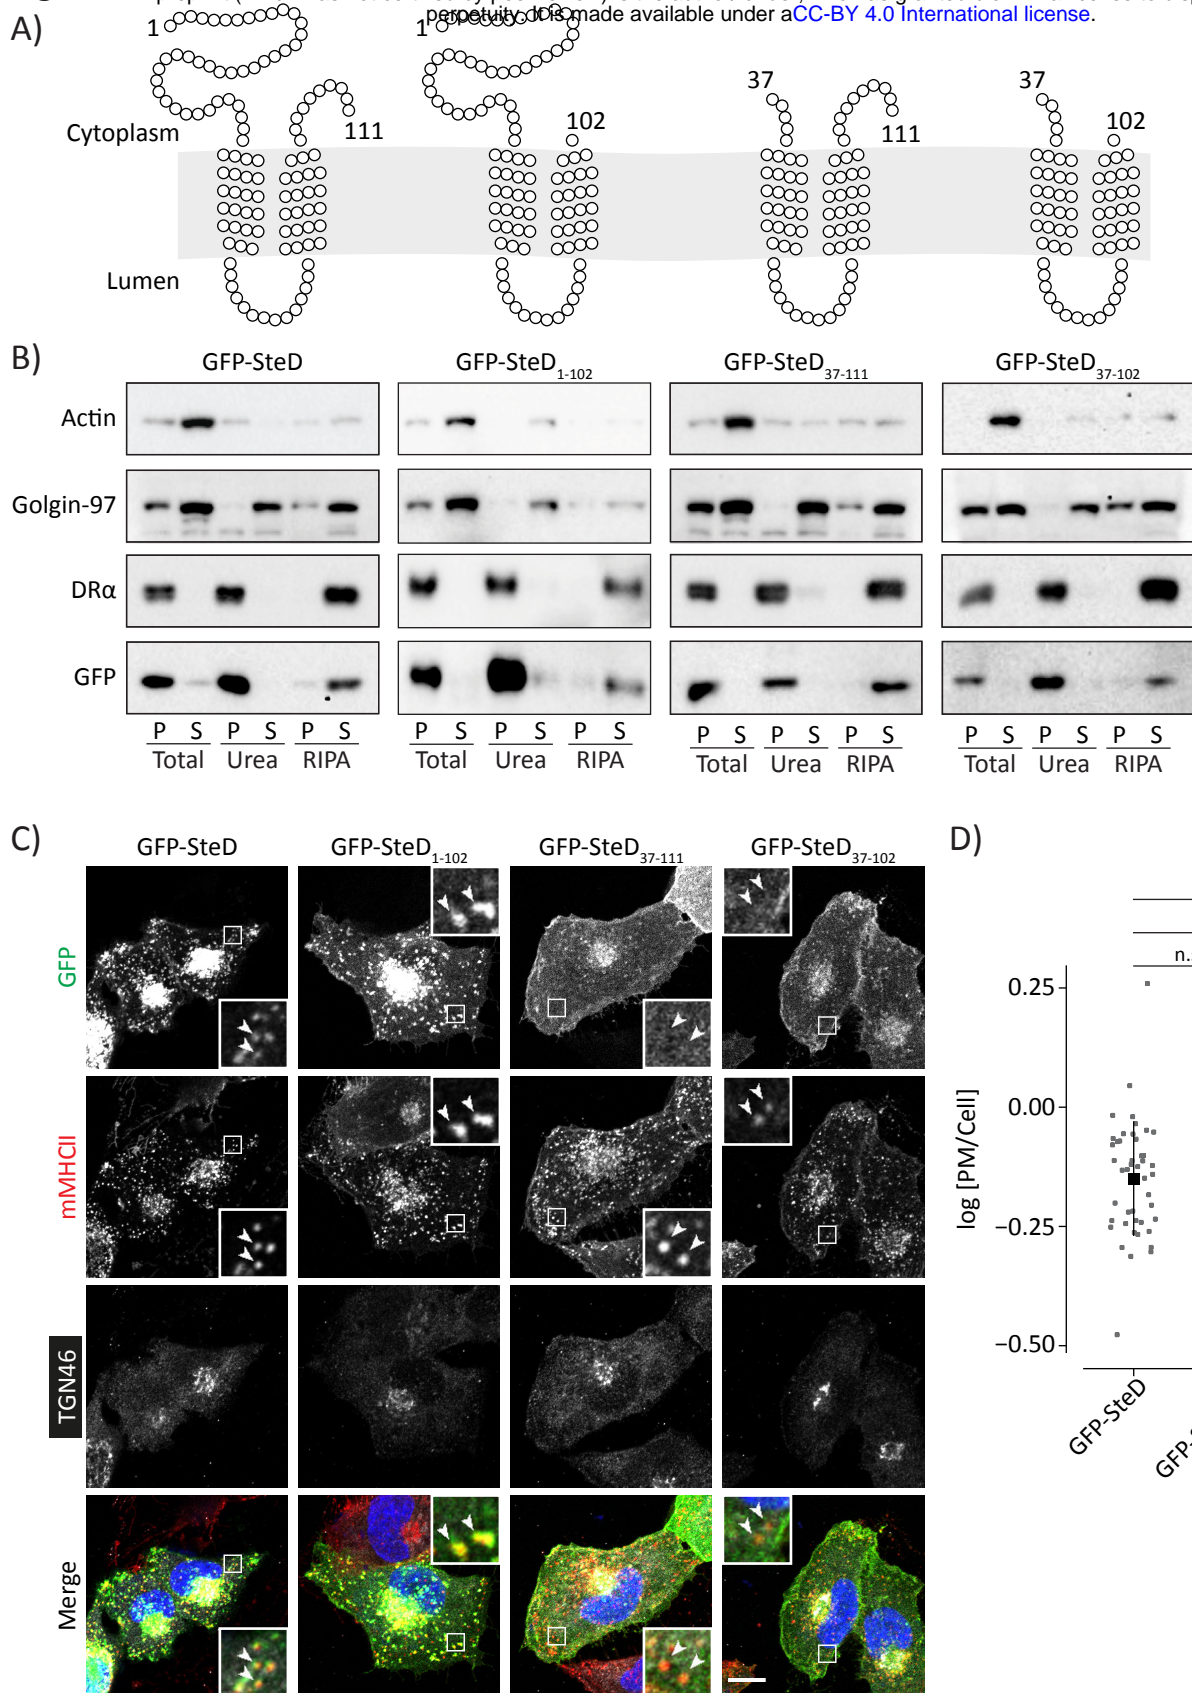

**Fig 6 – The N-terminal tail of SteD is required for trafficking to MHCII compartments**

(A) Schematics of SteD showing predicted transmembrane domains and extent of truncation mutations as indicated.

(B) Protein immunoblots of membrane fractionation samples from Mel JuSo cells expressing GFP-SteD (wt or mutants). Samples were taken from the pellet (P) and supernatant (S) of the total sample, after urea wash and after RIPA wash.

(C) Representative confocal immunofluorescence microscopy images of Mel JuSo cells expressing GFP-SteD (wt or mutants). Cells were fixed and processed for immunofluorescence microscopy by labelling for MHCII compartments (mMHCI, red), the TGN (TGN46, grey), and DNA (DAPI, blue). Arrowheads indicate MHCII compartments. Scale bar – 10  $\mu$ m.

(D) Quantification of GFP at the surface of cells represented in Fig 6C. The fluorescence intensity of the GFP signal at the surface of cells was measured in relation to total cellular fluorescence. Data are representative of three independent experiments. Each dot represents the value for one cell. Mean  $\pm$  SD. The  $\log_{10}$  fold change of the data were analysed by one-way ANOVA followed by Dunnett's multiple comparison test, \*\*\*  $p < 0.001$ , n.s. – not significant.

**Fig 7**

**A)**

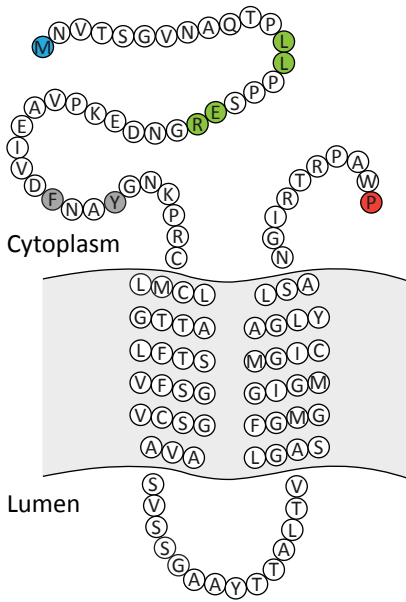

**B)**

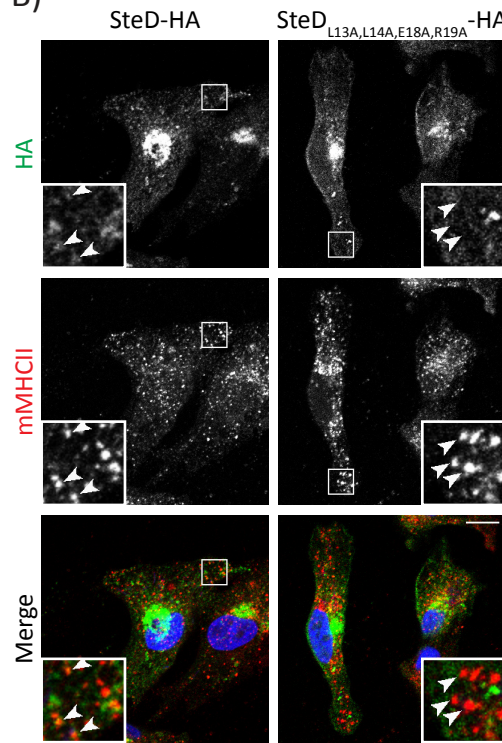

**F)**

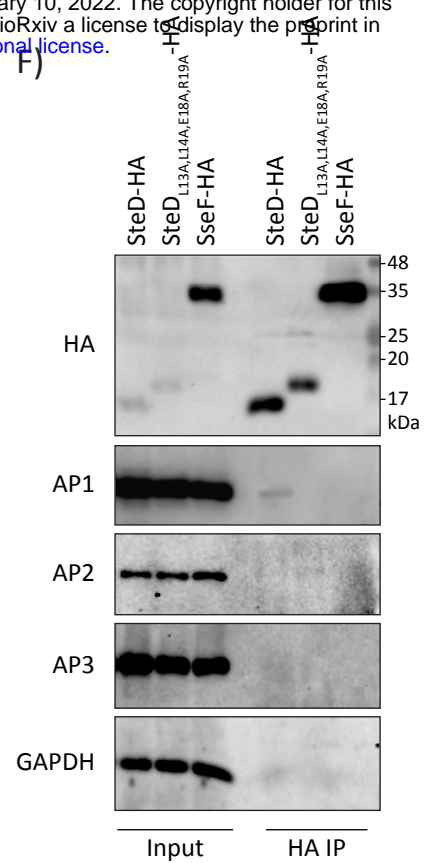

**C)**

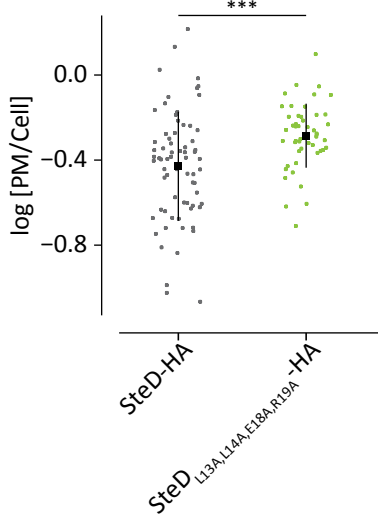

**D)**

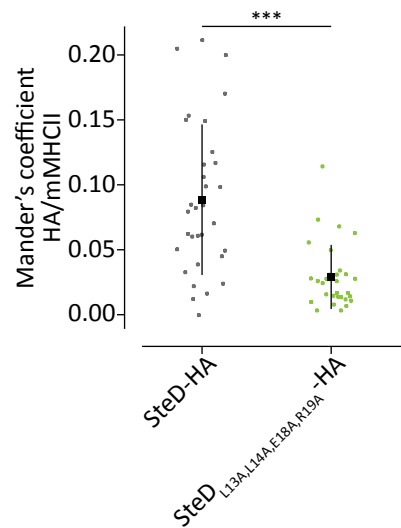

**E)**

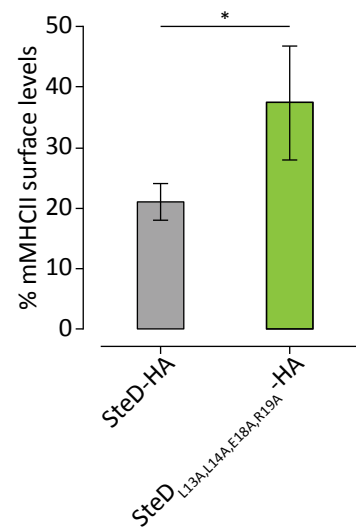

**G)**

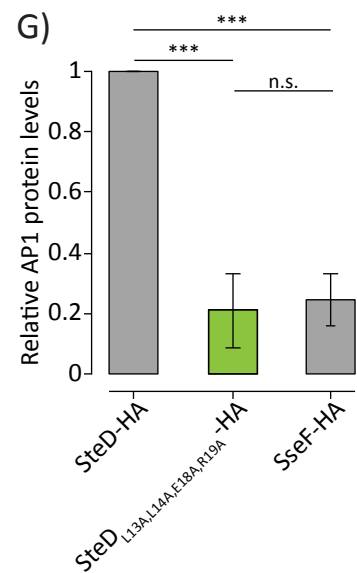

**Fig 7 – A dileucine motif-like sequence in the N-terminal tail of SteD mediates post-TGN trafficking**

(A) Amino acid sequence of SteD showing predicted transmembrane domains. The N- and C-terminal residues are highlighted in blue and red respectively. The residues substituted to alanines in SteD<sup>F32A,Y35A</sup> and SteD<sup>L13A,L14A,E18A,R19A</sup> are highlighted in grey and green respectively.

(B) Representative confocal immunofluorescence microscopy images of Mel Juso cells infected with  $\Delta$ steD *Salmonella* strains carrying a plasmid expressing SteD-HA (wt or mutant). Cells were fixed and processed for immunofluorescence microscopy by labelling for HA (green), MHCII compartments (mMHCII, red), and DNA (DAPI, blue). Arrowheads indicate mMHCII compartments. Scale bar – 10  $\mu$ m.

(C) Quantification of HA signal at the surface of cells represented in Fig 7B. The fluorescence intensity of the HA signal at the cell surface was measured in relation to total cellular fluorescence. Data are representative of three independent experiments. Each dot represents the value for one cell. Mean  $\pm$  SD. The log<sub>10</sub> fold change of the data were analysed by t-test, \*\*\* p<0.001.

(D) Mander's overlap coefficient of the fraction of SteD-HA positive pixels that colocalise with mMHCII positive pixels from cells as represented in Fig 7B. Data are representative of three independent experiments. Each dot represents the value for one cell. Mean  $\pm$  SD. Data were analysed by t-test, \*\*\* p<0.001.

(E) mMHCII surface of Mel Juso cells infected with  $\Delta$ steD *Salmonella* carrying a plasmid expressing SteD-HA (wt or mutant). Cells were analysed by flow cytometry and amounts of surface mMHCII in infected cells are expressed as a percentage of uninfected cells in the same sample. Mean of three independent experiments done in duplicate  $\pm$  SD. Data were analysed by paired t-test, \* p<0.05.

(F) Protein immunoblots of whole-cell lysates (Input) and immunoprecipitation with HA beads (HA IP) from Mel Juso cells infected with  $\Delta$ steD *Salmonella* strains carrying a plasmid expressing SteD-HA (wt or mutant) or SseF-HA following crosslinking with DSP. Mutation of charged residues might explain the difference in migration through the SDS gel. AP1 – antibody specific for the  $\gamma$  subunit, AP2 – antibody specific for the  $\alpha$  subunit, AP3 – antibody specific for the  $\delta$  subunit.

(G) Levels of immunoprecipitated AP1 were calculated by densitometry from immunoblots as represented in Fig 7F. Protein levels were normalised to wt SteD-HA. Mean of three independent experiments  $\pm$  SD. The data were analysed by one sample t-test, \*\*\* p<0.001, n.s. – not significant.

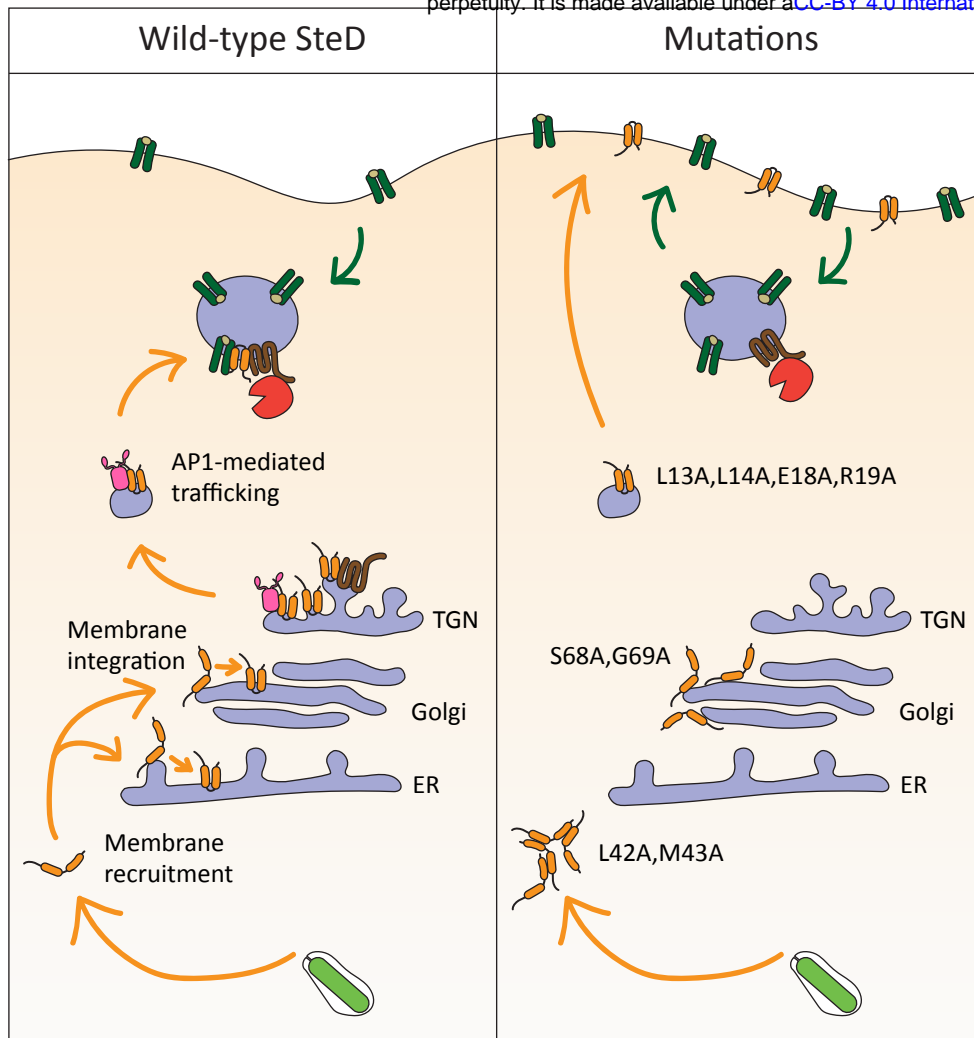

### Fig 8 – Model of SteD membrane integration and localisation

Following translocation from *Salmonella* (green) into the cytoplasm SteD (orange) is recruited to the membranes of the early secretory pathway where it integrates. SteD then migrates to and accumulates within the TGN. Through interaction with the AP1 complex (pink) it is trafficked to MHCII compartments, where it interacts with mMHCI (dark green), which is ubiquitinated through the actions of TMEM127 (brown) and WWP2 (red) causing a reduction in mMHCI surface levels.

SteD<sub>L42A,M43A</sub> mutation prevents membrane recruitment leading to aggregation in the cytoplasm. SteD<sub>S68A,G69A</sub> mutation prevents membrane integration resulting in a Golgi-associated non-integrative state. SteD<sub>L13A,L14A,E18A,R19A</sub> mutation prevents AP1 interaction leading to mis-trafficking of SteD to the plasma membrane.
